1 **Genomic stability and adaptation of beer brewing yeasts during serial repitching in the**  
2 **brewery**

3 Christopher R. L. Large<sup>1,2</sup>, Noah Hanson<sup>1</sup>, Andreas Tsouris<sup>3</sup>, Omar Abou Saada<sup>3</sup>, Jirasin  
4 Koonthongkaew<sup>4</sup>, Yoichi Toyokawa<sup>4</sup>, Tom Schmidlin<sup>5</sup>, Daniela A. Moreno-Habel<sup>6</sup>, Hal  
5 McConnellogue<sup>7</sup>, Richard Preiss<sup>8</sup>, Hiroshi Takagi<sup>4</sup>, Joseph Schacherer<sup>3,9</sup>, Maitreya J. Dunham<sup>1,\*</sup>

6  
7 <sup>1</sup>Department of Genome Sciences, University of Washington, Seattle, Washington 98195.

8 <sup>2</sup>Molecular and Cellular Biology Program, University of Washington, Seattle, Washington 98195.

9 <sup>3</sup>Université de Strasbourg, CNRS, GMGM UMR 7156, Strasbourg, France.

10 <sup>4</sup>Division of Biological Science, Nara Institute of Science and Technology, 8916-5 Takayama-cho,  
11 Ikoma, Nara 630-0192, Japan.

12 <sup>5</sup>Postdoc Brewing Co., Redmond, Washington, 98052.

13 <sup>6</sup>Elysian Brewing Co., Seattle, Washington, 98108.

14 <sup>7</sup>Drake's Brewing Co., San Leandro, California, 94577.

15 <sup>8</sup>Escarpment Laboratories, Guelph, ON, Canada.

16 <sup>9</sup>Institut Universitaire de France (IUF), Paris, France.

17

18

19 \*Corresponding Author: Maitreya J. Dunham

20 Email: [maitreya@uw.edu](mailto:maitreya@uw.edu)

## 21 **Abstract**

22 Ale brewing yeast are the result of admixture between diverse strains of *Saccharomyces*  
23 *cerevisiae*, resulting in a heterozygous tetraploid that has since undergone numerous genomic  
24 rearrangements. As a result, comparisons between the genomes of modern related ale brewing  
25 strains show both extensive aneuploidy and mitotic recombination that has resulted in a loss of  
26 intragenomic diversity. Similar patterns of intraspecific admixture and subsequent selection for  
27 one haplotype have been seen in many domesticated crops, potentially reflecting a general  
28 pattern of domestication syndrome between these systems. We set out to explore the evolution  
29 of the ale brewing yeast, to understand both polyploid evolution and the process of domestication  
30 in the ecologically relevant environment of the brewery. Utilizing a common brewery practice  
31 known as ‘repitching’, in which yeasts are reused over multiple beer fermentations, we generated  
32 population time courses from multiple breweries utilizing similar strains of ale yeast. Applying  
33 whole-genome sequencing to the time courses, we have found that the same structural variations  
34 in the form of aneuploidy and mitotic recombination of particular chromosomes reproducibly rise  
35 to detectable frequency during adaptation to brewing conditions across multiple related strains in  
36 different breweries. Our results demonstrate that domestication of ale strains is an ongoing  
37 process and will likely continue to occur as modern brewing practices develop.

38

## 39 **Introduction**

40 *Saccharomyces cerevisiae*, the common budding yeast, occupies a diverse number of  
41 environments, from an association with oak and fruit trees, to human-related industries such as  
42 baking and fermentation [1]. Modern efforts to characterize the diversity of *S. cerevisiae* through  
43 large whole-genome sequencing efforts have found a somewhat discrete population structure, in  
44 which strains isolated from a particular fermented beverage or geography are more closely related



45 to other yeasts from that environment [2–5]. Due to a tight association with humans, the genomes  
46 of yeast are thought to have been shaped by both historical migrations of humans and the  
47 environment in which they are reared. One of the best characterized examples of this human-  
48 associated adaptation or domestication is the beer brewing yeasts, which are divided into three  
49 large clades across the family tree of yeasts. The largest division is split over species barriers  
50 between the *S. cerevisiae* ale yeast and the lager yeasts, which are hybrids between *S. cerevisiae*  
51 and *S. eubayanus* [6]. The ale yeasts are further divided into two large groups coined as Beer 1  
52 and Beer 2, with several smaller mixed origin groups containing yeast from the bread, wine, and  
53 spirits industries. While the Beer 2 group consists primarily of diploid individuals used in traditional  
54 Belgian styles, the Beer 1 yeasts (herein called ale yeasts) consist of a diverse group of mostly  
55 tetraploid strains from Germany, Belgium, the UK, the USA, and Scandinavia [2,7]. The origin of  
56 the ale yeasts is hypothesized to come from a historical admixture between several *S. cerevisiae*  
57 subpopulations who have similar genomic signatures as the extant populations of European and  
58 Asian wine strains with some beer brewing strains that are no longer in existence [8]. The diversity  
59 and structure of these populations has allowed for extensive study of the specific molecular  
60 adaptations beer brewing yeasts have to their human-created environment, making them an  
61 excellent system in which to study the genetic basis of domestication.

62

63 Using a combination of genotype association and phenotyping in previous works, several  
64 specific genetic variations have been linked to traits that are either beneficial for the flavor of a  
65 particular beer or for growth in a beer brewing environment. First, in comparison to wild strains,  
66 the ale brewing yeasts lack the ability to produce the flavor compound 4-vinylguaiacol (4-VG),  
67 which is undesirable in certain beer styles, through the inactivation of two genes, *PAD1* and *FDC1*  
68 [9,10]. Interestingly, one lineage of ale yeasts which are specifically used for making wheat beers  
69 in which 4-VG is a desirable characteristic, retain functional alleles, highlighting the diversity and  
70 specialization of the domesticated strains [2,5]. Second, ale yeasts encode an expansion of genes

71 involved in the uptake and breakdown of maltose and maltotriose, two uniquely important sugar  
72 sources for beer brewing [2,5]. Finally, both wine and ale brewing yeasts show evidence for loss  
73 of function alleles in *AQY1* and *AQY2* resulting in increased osmotolerance in high sugar content  
74 environments [5,11]. However, there is a functional allele of *AQY2* present in some of the ale beer  
75 strains, potentially indicating either a lack of selection for this allele or an environment-dependent  
76 selective benefit. As most of these putative adaptations have been identified because they are  
77 shared among most or all of the ale brewing yeasts (Beer 1), it is unclear to what extent there are  
78 additional genetic variations which are resultant from adaptive evolution or domestication within  
79 subsets of the beer brewing yeasts.

80

81         Furthermore, these single gene events have simplified the process of connecting them to  
82 potential phenotypes while other mutations prominent in the lineage are more difficult to interpret.  
83 Likely as a result of the reduced ability of ale brewing yeasts to complete meiosis and the  
84 increased mutation rate of both aneuploidy and mitotic recombination in tetraploids [12], tracts of  
85 homozygosity have been extensively observed in these yeasts. Similarly, in lager brewing yeasts,  
86 extensive aneuploidy and mitotic recombination between and within these two genomes have led  
87 to tracts of homozygosity favoring certain *S. cerevisiae* or *S. eubayanus* alleles [6,13–15].  
88 Although it is unclear what the consequence of these intragenomic events are in ale and lager  
89 yeasts, previous works from our group and others have shown that loss of heterozygosity (LOH)  
90 caused by mitotic recombination in a previously heterozygous strain can lead to drastic fitness  
91 consequences on the time scale of short-term experimental evolution [16–20]. Furthermore, in  
92 other yeasts, such as *Candida albicans* and *Cryptococcus neoformans*, extensive aneuploidy and  
93 LOH can lead to diverse phenotypic outcomes such as increased drug resistance and competitive  
94 growth (reviewed in [21]). Finally, in mitotically dividing human cells, LOH of a non-functional  
95 tumor suppressor allele can lead to an increased risk of cancer progression including, among  
96 others, *BRCA1* mediated breast and ovarian cancer [22]. While LOH has been both observed

97 frequently in ale yeasts and has been seen to have phenotypic consequences in other mitotic cell  
98 populations, it has yet to be linked conclusively to traits in ale brewing yeasts.

99

100         Additionally, ale yeasts' reduced ability to effectively go through meiosis complicates  
101 traditional quantitative trait mapping approaches for interpreting genetic variation. Alternative  
102 approaches that do not rely on meiosis, such as experimental evolution and genetic screens,  
103 have provided valuable insights into adaptation generally, including the importance of specific  
104 mutations, copy number variation [23], and ploidy [24]. Therefore, we decided to study adaptation  
105 to the brewery by taking advantage of a form of experimental evolution already being conducted  
106 at breweries. Typically, professional brewers serially reuse populations of yeast to brew batches  
107 of beer in a practice known as repitching or backslopping to reduce the financial burden of  
108 constantly buying yeast and to give the yeast the opportunity to physiologically adapt to the  
109 brewery. The process begins when a brewery purchases a batch of a particular yeast strain at  
110 scale (population size of  $\sim 2 \times 10^{13}$ ) from a propagation company. These yeasts have commonly  
111 been grown from a patch of yeast, derived from a clonal glycerol stock stored at  $-80^{\circ}\text{C}$ . When a  
112 propagation company sends out these yeasts, they often grow the stock beyond the needs of a  
113 single brewery to meet the demand for a particular strain, meaning that there are many  
114 generations of yeast growth that occur before the yeast arrive in the brewery (minimum of  $\sim 50$   
115 yeast generations). Once the yeasts arrive at the brewery they are inoculated or 'pitched' into a  
116 cereal and grain derived beer medium or 'wort'. After the completion of fermentation at 10-14  
117 days, the yeasts will flocculate to the bottom of the fermenter and are then collected. The brewer  
118 will typically collect approximately a third of the yeast, avoiding the trub that is made up of hop  
119 and protein particulates, and repitch the yeast into the next fermentation vessel with fresh wort.  
120 The actual number of yeast cells that are transferred varies from brewery to brewery and is often  
121 modified to match the starting sugar content of the media and the current viability of the yeasts.

122

123           Brewers will often limit the number of times that yeast are repitched to ~8 reuses to reduce  
124 the possibility of a failed batch by contamination, physiological changes to viability and vitality  
125 [25–27], and taste profile changes due to altered physiology [28,29] or genetic mutation. However,  
126 there are conflicting results about how long repitching can be continued before beer brewing yeast  
127 will undergo a detectable genetic change by evolution. Early research on the genetic consistency  
128 of brewing yeasts found the possibility that genetic mutations can affect brewing-relevant  
129 characteristics by phenotyping clones isolated from populations of reused yeasts in a continuous  
130 use fermenter [30]. Further research by a separate group found changes in flocculation behavior  
131 in clone isolates from serially reused yeasts over several years, potentially due to a deletion  
132 mutation in a flocculation-related gene [31]. Additionally, one study looking at population samples  
133 from serial reuse of yeasts was not able to show any genetic mutation over 135 serial  
134 fermentations through the use of gel-electrophoresis based methods [32]. In contrast, some  
135 recent works on lager fermentations of buckwheat and quinoa beer have found potential  
136 alterations in chromosome length over the course of serial repitching [33]. Despite the recent  
137 evidence that genetic based changes in beer characteristics rarely occur over short-term  
138 repitching, there are striking phenotypic differences between brewing yeasts that are almost  
139 certainly caused by genetic variation. Matching these observations, it is a common practice  
140 among professional and home brewers to cultivate a yeast strain for an extended number of yeast  
141 pitches to generate a so-called ‘house strain’ with altered brewing characteristics indicating that  
142 genetic changes will likely occur over some relatively short time period in the brewery. However,  
143 the mutational basis, timing, and consequence of these changes has not been fully documented  
144 using modern high-throughput whole genome sequencing.

145

146           Herein we describe the effect of long-term repitching on brewing yeasts from samples  
147 collected in collaborations with multiple breweries across the United States and Canada who use  
148 an American brewing strain, serially-repitched for greater than 10 cycles. From these

149 collaborations we either collected a time course across the pitches and sequenced several  
150 representative time points, or sequenced a starting and final population (Fig 1). Using a  
151 combination of short and long read (Illumina and Oxford Nanopore) sequencing, we found large-  
152 scale chromosomal rearrangements rising to a detectable frequency even within the first several  
153 generations of repitching. As well, we discovered a potential link between a specific mitotic  
154 recombination event and both growth phenotypes and flavor metabolite production.

155

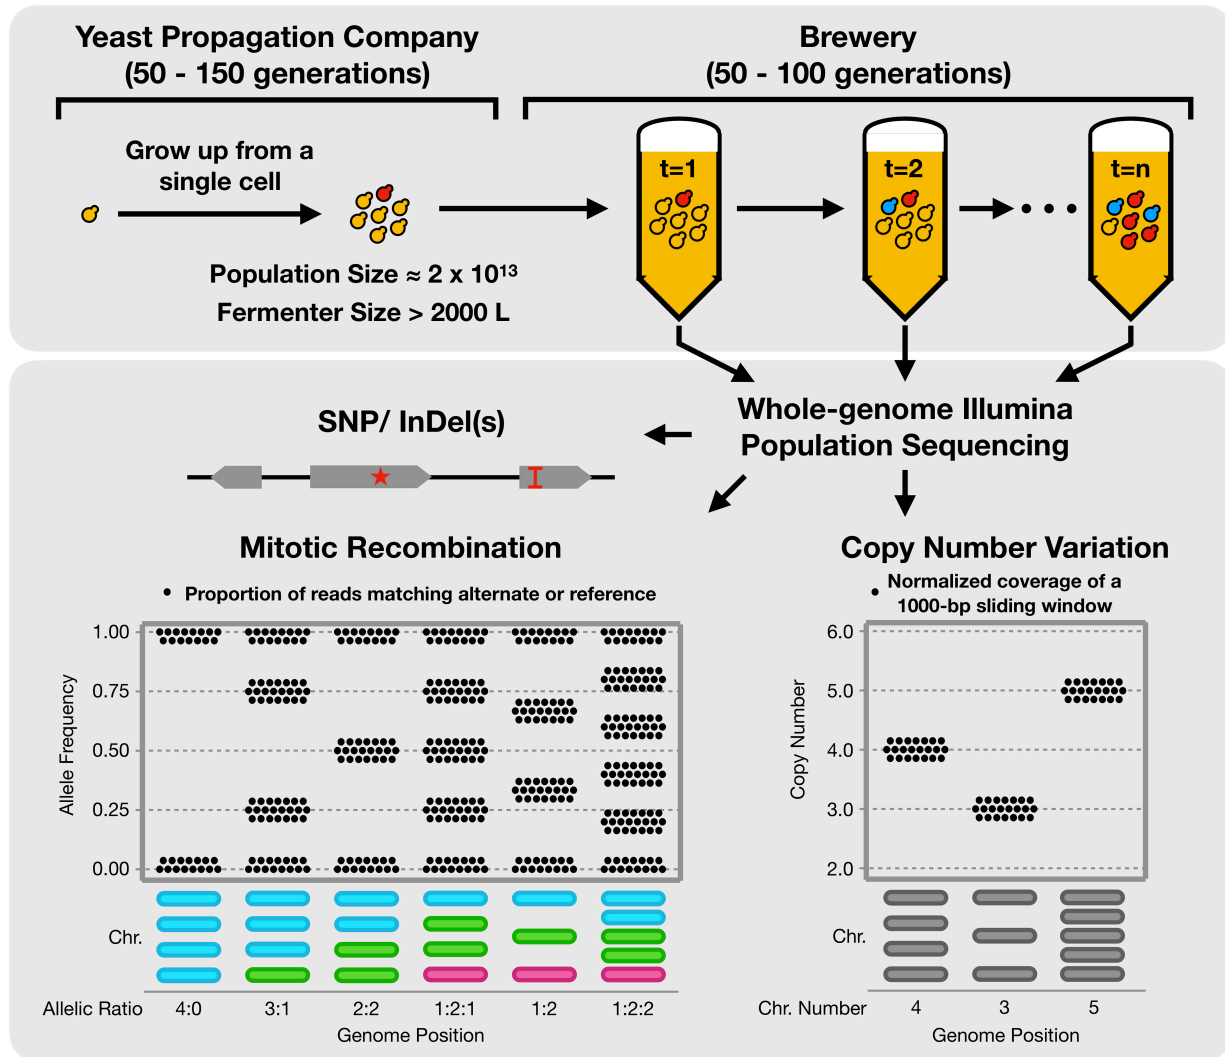

156

157 **Fig 1. Research strategy to investigate a natural evolution experiment occurring in the**

158 **brewery.** Ale brewing yeast purchased from propagation companies at industrial scale and

159 serially repitched for >15 beers are sequenced with whole-genome Illumina population

160 sequencing to find signatures of evolution during brewery repitching. Mitotic recombination

161 events are detected through allele frequency graphs (represented here), which denote every position of

162 the genome as a point whose height is determined by the frequency of reads supporting either a

163 reference or alternate allele. Copy number variation is detected and displayed as 1000-bp sliding

164 windows, normalized by the average coverage across the genome.

## 165 **Results**

166 We set out to tap into the natural evolution experiment occurring at modern breweries to  
167 test whether domestication is actively occurring in ale yeasts (Fig 1). We established  
168 collaborations with four breweries across the USA and Canada: Postdoc Brewing Co., Drake's  
169 Brewing Co., Red Circle Brewing Co., and Elysian Brewing Co. All four breweries use a popular  
170 family of American yeast strains known as the 'Chico' yeasts and repitch for an extended number  
171 of cycles (>15), facilitating direct comparisons. Each brewery collected population samples of  
172 serially repitched yeast from independent beer lineages. For Postdoc Brewing Co. and Elysian  
173 Brewing Co. respectively we were able to collect two and three replicate beer lineages, plus one  
174 lineage each from the other two brewery partners. A complete record of the brewery populations  
175 is available in Table 1. Using whole-genome sequencing, we compared the starting genotype  
176 assessed from either a clone or population depending on availability with the last time point  
177 population sample for each beer lineage. For one replicate from Postdoc Brewing Co. we  
178 sequenced multiple population time points, and a number of representative clones isolated from  
179 the beginning and end time points for further experimental use. Given the time it takes to fully  
180 ferment a beer at an industrial scale, we estimate that the total time encapsulated in our  
181 experiments is on the order of four and a half years of yeast evolution.

182

183 **Table 1. Record of strains from brewery collaborations**

| Pop. Name   | Brewery             | Brewery ID | Strain       | Rep. | Repitch Number | Variants Filtered By |
|-------------|---------------------|------------|--------------|------|----------------|----------------------|
| PDB1        | Postdoc Brewing Co. | PDB        | Wyeast 1056  | 1    | 0              | N/A                  |
| PDB6        | Postdoc Brewing Co. | PDB        | Wyeast 1056  | 1    | 6              | PDB1                 |
| PDB15       | Postdoc Brewing Co. | PDB        | Wyeast 1056  | 1    | 15             | PDB1                 |
| PDB19       | Postdoc Brewing Co. | PDB        | Wyeast 1056  | 1    | 19             | PDB1                 |
| PDB26       | Postdoc Brewing Co. | PDB        | Wyeast 1056  | 1    | 26             | PDB1                 |
| PDB1 Rep. 2 | Postdoc Brewing Co. | PDB        | Imperial A07 | 2    | 1              | N/A                  |

| PDB29 Rep. 2 | Postdoc Brewing Co.    | PDB        | Imperial A07        | 2    | 29             | PDB1 Rep. 2          |
|--------------|------------------------|------------|---------------------|------|----------------|----------------------|
| E01          | Elysian Brewing Co.    | Elysian.   | BRY-96              | 1    | 0              | N/A                  |
| E03          | Elysian Brewing Co.    | Elysian    | BRY-96              | 1    | 15             | E01                  |
| E08          | Elysian Brewing Co.    | Elysian    | BRY-96              | 2    | 15             | E01                  |
| E09          | Elysian Brewing Co.    | Elysian    | BRY-96              | 2    | 17             | E01                  |
| E05          | Elysian Brewing Co.    | Elysian    | BRY-96              | 3    | 1              | E07                  |
| E07          | Elysian Brewing Co.    | Elysian    | BRY-96              | 3    | 0              | N/A                  |
| E10          | Elysian Brewing Co.    | Elysian    | BRY-96              | 3    | 14             | E07                  |
| DK01         | Drake's Brewing Co.    | Drakes     | White Labs WLP001   | 1    | 24             | SRR7406282           |
| RCB01        | Red Circle Brewing Co. | Red Circle | Escarpment Cali Ale | 1    | 36             | SRR7406282           |
| Clone Name   | Brewery                | Brewery ID | Strain              | Rep. | Repitch Number | Variants Filtered By |
| PDB1 c1      | Postdoc Brewing Co.    | PDB        | Wyeast 1056         | 1    | 1              | PDB1                 |
| PDB1 c2      | Postdoc Brewing Co.    | PDB        | Wyeast 1056         | 1    | 1              | PDB1                 |
| PDB26_c1     | Postdoc Brewing Co.    | PDB        | Wyeast 1056         | 1    | 26             | PDB1                 |
| PDB26 c2     | Postdoc Brewing Co.    | PDB        | Wyeast 1056         | 1    | 26             | PDB1                 |
| PDB26 c3     | Postdoc Brewing Co.    | PDB        | Wyeast 1056         | 1    | 26             | PDB1                 |
| PDB26_c4     | Postdoc Brewing Co.    | PDB        | Wyeast 1056         | 1    | 26             | PDB1                 |
| PDB26 c5     | Postdoc Brewing Co.    | PDB        | Wyeast 1056         | 1    | 26             | PDB1                 |
| PDB26 c6     | Postdoc Brewing Co.    | PDB        | Wyeast 1056         | 1    | 26             | PDB1                 |
| PDB26_c7     | Postdoc Brewing Co.    | PDB        | Wyeast 1056         | 1    | 26             | PDB1                 |
| PDB26 c9     | Postdoc Brewing Co.    | PDB        | Wyeast 1056         | 1    | 26             | PDB1                 |
| PDB26 c10    | Postdoc Brewing Co.    | PDB        | Wyeast 1056         | 1    | 26             | PDB1                 |
| PDB26_c11    | Postdoc Brewing Co.    | PDB        | Wyeast 1056         | 1    | 26             | PDB1                 |
| PDB26 c12    | Postdoc Brewing Co.    | PDB        | Wyeast 1056         | 1    | 26             | PDB1                 |
| PDB26 c13    | Postdoc Brewing Co.    | PDB        | Wyeast 1056         | 1    | 26             | PDB1                 |
| PDB26_c20    | Postdoc Brewing Co.    | PDB        | Wyeast 1056         | 1    | 26             | PDB1                 |
| PDB26 c23    | Postdoc Brewing Co.    | PDB        | Wyeast 1056         | 1    | 26             | PDB1                 |



185           As is common with most breweries, the same recipe was not used for each beer pitch,  
186 resulting in a potentially changing environment for the yeasts. Although these experiments are  
187 less controlled than traditional laboratory evolution experiments they provide a more realistic  
188 capture of the brewing environment. For the Postdoc Brewing Co. experiments, the order of  
189 different styles that the yeast went through is available in Supp. Table 1. Overall, the yeasts  
190 experienced an estimated final alcohol by volume (ABV) of around 5-6%. As well, for the Elysian  
191 samples, data collected at the brewery about the fermentation performance of each beer are  
192 available in Supp. Table 2 and show no strong deviation over the repitches.

193

194           Attempting to capture the full repertoire of genome variations that can occur and contribute  
195 to evolution, we investigated Single Nucleotide Polymorphisms (SNPs), Insertions and Deletions  
196 (InDels), copy number variations (CNVs), and changes in allele frequency resulting from mitotic  
197 recombination. First, in order to properly identify what variation occurred *de novo* during serial  
198 repitching, and how that variation relates to what occurs across the breweries, we established the  
199 relationship between the strains in our study cohort using phylogenetics.

200

## 201 **Relationship between strains**

202           The history of the American brewing strains as told by brewers originates from just a  
203 handful of breweries. The Chico yeasts are specifically thought to originate from a 'house-strain'  
204 of the Sierra Nevada Brewing Company's isolate of BRY-96, which is sold by the Siebel Institute.  
205 BRY-96 itself is thought to originate from P. Ballantine and Sons Brewing Company, which started  
206 in 1840 in Newark, New Jersey. The strain has since been distributed to a large number of  
207 breweries and yeast propagation companies. To provide a fuller picture of the genetic history of  
208 the American brewing yeasts, we collected not just the strains used by our brewery partners but  
209 also new clone samples of American brewing strains that are available for purchase and not  
210 believed to have been previously sequenced. In all, we sequenced 13 American brewing strains,

211 and reanalyzed an additional 17 strains that had previously been sequenced using short-read  
212 sequencing (Supp. Table 3). Wanting to confirm the relationships between our study cohort, we  
213 applied phylogenetic inference on the strains. From their whole-genome sequence, we built a  
214 maximum likelihood tree based on the variation between these strains. However, as mentioned  
215 earlier, because there has been extensive mitotic recombination in these yeasts, we suspected  
216 that phylogenetic inference could be influenced by large blocks of shared, ancestral variation  
217 being lost. To avoid this issue, we filtered the American brewery strains variant calls by the most  
218 diverged American strain, BE051, to control for the potential loss of shared variation. As well, to  
219 encapsulate the polyploid nature of the beer strains, we encoded heterozygous variation in the  
220 genome sequences for phylogenetic inference (see methods for more details).

221

222         Matching with oral history, we found from our constructed phylogeny that Wyeast 1056  
223 (Postdoc Brewing Co.), Imperial A07 (Postdoc Brewing Co.), White Labs WLP001 (Drake's  
224 Brewing Co.) and Escarpment's Cali Ale (Red Circle Brewing Co.), and other Chico yeasts are all  
225 closely related and form two large clades (Fig 2). As well, we found that the WLP001 and Wyeast  
226 1056 clades are likely derived from BRY-96 (Elysian Brewing Co.), as there is only an 11 SNP  
227 difference between a reconstructed common ancestor of the two Chico strains and an isolate of  
228 what is thought to be the original BRY-96 (kindly donated by Lallemand Inc.). Additionally, from a  
229 sequenced isolate of a strain from P. Ballantine and Sons Brewing Company that was deposited  
230 in a strain repository in 1972 (NRRL Y-7408), we found that this strain groups outside of the rest  
231 of the American brewing strains, indicating that it is indeed a diverged American brewing strain.  
232 However, because large segments of variation are lost from NRRL Y-7408 that exist in the internal  
233 American brewing strains, we suspect that the Ballantine strain is not the literal genetic ancestor.

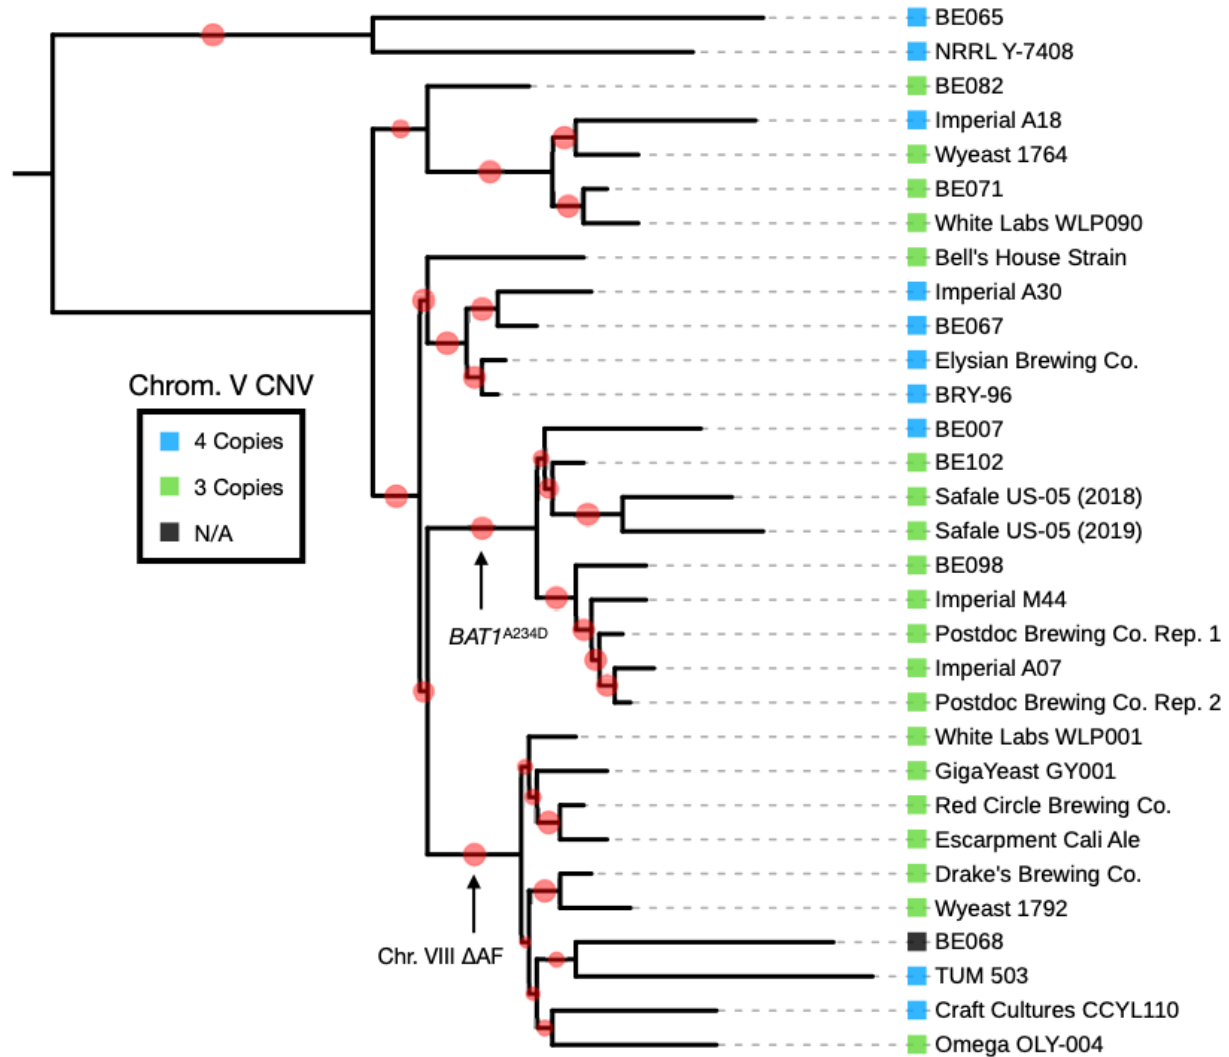

234

235 **Fig 2. A maximum-likelihood phylogeny of the American brewing strains reveals several**

236 **large clades.** Specifically, two Chico yeast groups, and their presumed genetic ancestor, BRY-

237 96 were found to group with other commercially available strains. The branch support bootstrap

238 values are displayed in red on the adjoining branch, with smaller values corresponding to less

239 support.

240

## 241 ***De novo* Single Nucleotide Polymorphisms, Insertions, and Deletions**

242           With the ancestral strain sequences in hand, we next called *de novo* mutations that  
243 occurred during each repitching time course. Utilizing multiple SNP and InDel variant callers on  
244 the first replicate of the Postdoc Brewing Co. populations we did not find any *de novo* SNP or  
245 InDel that occurred during the course of the repitching experiment and reached a detectable  
246 frequency (estimated detection limit of ~2% of alternate reads). Using sequencing of clones  
247 isolated from the first time point to filter the variant calls from the populations, we found 11  
248 mutations that were shared by all of the Postdoc Brewing Co. time points and had occurred in the  
249 population before entering the brewery based on the sequences from the clone isolates, the  
250 population from the second Postdoc Brewing Co. replicate, and the Imperial A07 clone isolate.  
251 Calculating the change in frequency of these mutations over the time course, we found that the  
252 only mutation that changed by more than a 1% increase in the population was a synonymous  
253 mutation in *PTC6* (which increased from 25.2% to 44.4% in the population, Supp. Table 4). While  
254 it is known that synonymous mutations can impact traits, it's more likely that this is a passenger  
255 mutation, particularly since the mutation affects only one allele in a pentaploid region of the  
256 genome. We additionally observed a number of private SNPs and InDels within clones from both  
257 the first and last time points, with an average of 11.9 mutations per clone and a total of 177 unique  
258 mutations (Supp. Table 5 and Supp. Fig 1).

259  
260           Expanding our analysis to the samples from the other collaborations, we found a total of  
261 106 mutations, with an overall average of 15.1 mutations observed in each population (Supp.  
262 Table 5). Looking for evidence of adaptive evolution through convergence of mutations, we found  
263 that between experiments, there were 5 genes wherein multiple mutations were observed in the  
264 coding sequence between experiments (Table 2). We note that mutations in *UBP1*, which  
265 encodes a ubiquitin protease, were previously identified in experimental evolution of a lager strain  
266 [34], and mutations in *TFB1*, a nucleotide excision repair factor and subunit of TFIIH, were found

267 in strains that had survived for two years in a sealed beer bottle [35]. However, in neither of these  
 268 cases were phenotypic consequence proven. Further experiments recreating these mutations in  
 269 clean genetic backgrounds will be necessary to determine their impact.

270

271 **Table 2. The *de novo* mutations within the same genes between brewery populations**

| Sample              | Tool      | Chromosome | Location | Ref | Alt | MutationType         | Gene    | Gene  | Effect   | FinalAF |
|---------------------|-----------|------------|----------|-----|-----|----------------------|---------|-------|----------|---------|
| PDB29 Rep. 2        | freebayes | chrIV      | 244970   | G   | T   | coding-nonsynonymous | YDL122W | UBP1  | D807Y    | 0.103   |
| Red Circle Brewing  | lofreq    | chrIV      | 244223   | G   | T   | coding-nonsynonymous | YDL122W | UBP1  | E558Stop | 0.040   |
| Elysian09           | lofreq    | chrIV      | 188256   | G   | C   | coding-nonsynonymous | YDL148C | NOP14 | Y777Stop | 0.101   |
| Elysian10           | lofreq    | chrIV      | 188256   | G   | C   | coding-nonsynonymous | YDL148C | NOP14 | Y777Stop | 0.129   |
| Elysian10           | lofreq    | chrIV      | 1085392  | C   | T   | coding-nonsynonymous | YDR311W | TFB1  | R110W    | 0.108   |
| Drake's Brewing Co. | lofreq    | chrIV      | 1085083  | G   | T   | coding-nonsynonymous | YDR311W | TFB1  | A7S      | 0.077   |
| PDB26 Rep. 1        | freebayes | chrXI      | 245205   | C   | G   | coding-nonsynonymous | YKL104C | GFA1  | G57R     | 0.077   |
| PDB29 Rep. 2        | freebayes | chrXI      | 245205   | C   | G   | coding-nonsynonymous | YKL104C | GFA1  | G57R     | 0.117   |
| Elysian03           | lofreq    | chrXII     | 905505   | G   | A   | coding-synonymous    | YLR392C | ART10 | N267N    | 0.176   |
| Elysian08           | lofreq    | chrXII     | 905987   | G   | A   | coding-nonsynonymous | YLR392C | ART10 | P107S    | 0.049   |

272

273

#### 274 ***De novo* chromosome copy number variation**

275 We next investigated whether there were any large scale genomic changes by plotting the  
 276 read coverage across the genome for the Postdoc Brewing Co. time course. In line with previous  
 277 work, we observed that the 'Chico' yeasts are largely tetraploid, and have had several whole  
 278 chromosome and segmental copy number changes (CNVs) that occurred at some point in its  
 279 recent past (Fig 3A). We observed that during the Postdoc Brewing Co. time course there was a  
 280 copy number change of chromosome V which led to an increase from 3 to 4 chromosomal copies  
 281 at a final estimated frequency in the population of 48.2% (Fig 3B). The second Postdoc Brewing  
 282 experiment also replicated the increase in copy number on chromosome V (Fig 3C). Interestingly  
 283 though, and unlike in the first Postdoc Brewing Co. replicate, the mutation entered the brewery at  
 284 an estimated frequency of 27.6% and reached a frequency of 94.9% by the end of the experiment.  
 285 For the population from Drake's Brewing Co., we observed an estimated frequency of 27.9% for  
 286 the chromosome V increase in copy number, indicating another replication of the same mutation.  
 287 While no starting population was available for the sample, two separate sequences of WLP001

288 were uploaded two years apart by different groups and both shared 3 copies of chromosome V,  
289 indicating that the starting strain likely had 3 copies. Additionally, the strain from Red Circle  
290 Brewing Co., which is of similar origin, maintained 3 copies of chromosome V.

291  
292         Wanting to determine whether the potential benefit of the aneuploidy was due to an  
293 increase in copy number of a particular haplotype or a restoration of a euploid copy number for  
294 dosage balance, we investigated whether one particular copy of chromosome V was recurrently  
295 amplified between populations. Our expectation is that gaining a chromosome copy will change  
296 the allele frequency of heterozygous variants by a change in the proportion of haplotypes.  
297 Through investigation of the direction that variants change allele frequency, we can determine  
298 which chromosome is amplified (See Fig 1 for allele frequency plot description). Therefore, we  
299 investigated whether the allelic ratio between haplotypes had changed by plotting the allele  
300 frequency of variants on chromosome V for the two Postdoc Brewing Co. and Drake's Brewing  
301 Co. experiments. However, upon plotting the allele frequency from the first and last time points  
302 we found very little to no change had occurred despite the chromosome copy number change  
303 (Fig 3D and Supp. Fig 2).

304  
305         From a clone isolated from the final population of the Postdoc Brewing Co., replicate 1  
306 experiment that had an extra copy of chromosome V, we found that, in a clonal sample, as  
307 expected, the allele frequency does change and shows three large chromosomal regions with  
308 different allele frequency patterns. The clone helped show that the starting strain has three  
309 haplotypes on the left arm, two in the middle in a 2:1 ratio and is homozygous on the right arm.  
310 Given these patterns, we expect that depending on which chromosome was amplified, the allele  
311 frequency will shift according to the number of haplotypes (Left: 0.33/0.66 to 0.25/0.50/0.75;  
312 Center: 0.33/0.66 to 0.25/0.75 or 0.50; Right: No change, summarized on the right of Fig 3D).  
313 However, because the allele frequency pattern did not change in a significant manner, we instead

314 concluded that there are likely multiple mutation events, each of which amplified a different  
315 chromosome V haplotype. These independent mutations have occurred in separate lineages that  
316 have risen in frequency with similar kinetics. Therefore, we suspect that the increase in copy  
317 number of chromosome V likely occurred multiple times in both Postdoc Brewing Co. replicates,  
318 indicating a haplotype independent fitness benefit.

319

320         The experiment(s) at Elysian Brewing Co. utilized BRY-96, which already contained 4  
321 copies of chromosome V and did not show any additional evidence of aneuploidy. It is likely that  
322 the ancestral state of chromosome V is euploid based on the phylogenetic relationship between  
323 the American brewing strains (Fig 2). Since the chromosome loss event appears to have occurred  
324 multiple times in the 'Chico' phylogeny (Fig 2), it's possible that this state could be selectively  
325 advantageous in certain environments. An alternative explanation is that when the common  
326 ancestor of WLP001 and Wyeast 1056 was clone isolated, the single-cell bottleneck fixed a  
327 deleterious mutation for growth, which was then reverted upon serial passaging in brewery  
328 conditions.



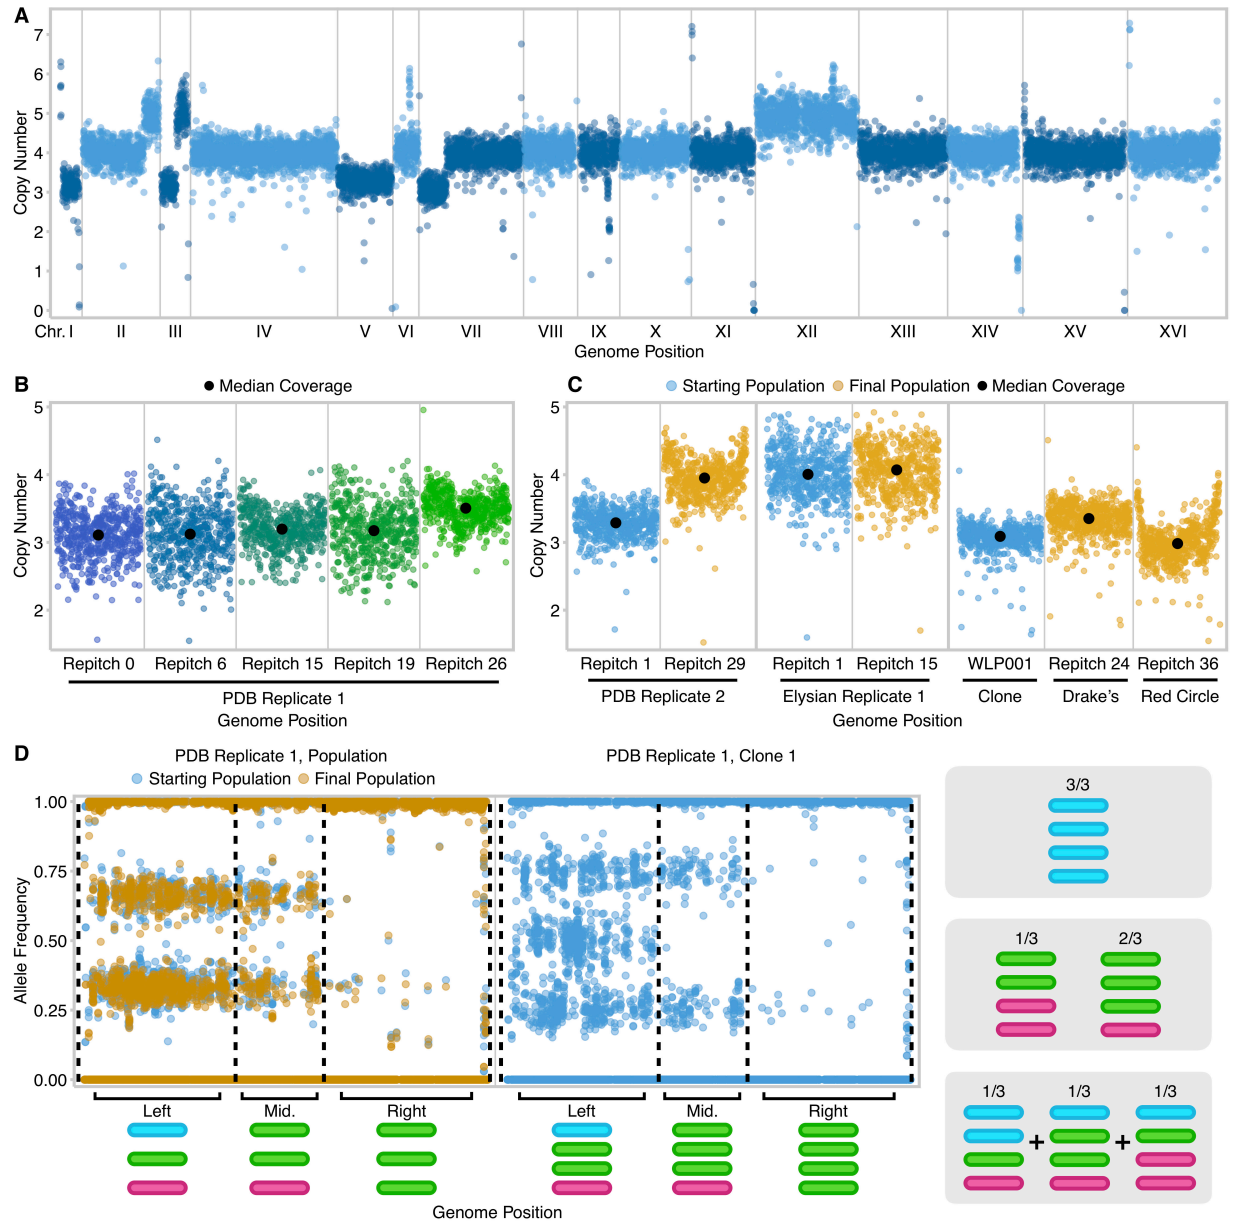

329

330 **Fig 3. Copy number variation of chromosome V occurs multiple times between breweries**

331 **and within the same brewery. (A) Whole-genome coverage of Imperial A07, highlighting the**

332 **degree of chromosomal and sub-telomeric copy number alterations. (B) A time course of the**

333 **Postdoc Brewing Co. replicate 1 is shown in 1000-bp coverage windows. A copy number change**

334 **of chromosome V reaches 48.2% of the population by repitch 26. (C) The copy number increase**

335 **of the second Postdoc Brewing Co. replicate population, starting at 27.6% of the population and**

336 **reaching fixation by the 29th repitch. The strain BRY-96, which is used in Elysian Brewing Co.**



337 starts with a euploid copy number and remains constant during repitching. Drake's Brewing Co.,  
338 which is from WLP001, has an aneuploid lineage which reaches 94.9% of the population. The  
339 sample from Red Circle Brewing Co. showed an increase coverage near the telomeres across its  
340 genome, but this is likely a well-documented artifact [2] (D) Allele frequency of the Postdoc  
341 Brewing Co. replicate 1 population and a clone isolated from that population showing the number  
342 and pattern of haplotypes on chromosome V. The lack of a shift in allele frequency indicates that  
343 in the population, multiple lineages likely independently had different haplotypes amplified. The  
344 probability of any given haplotype being amplified is displayed on the right.

345

#### 346 ***De novo changes in heterozygosity***

347 We next investigated whether there were copy number neutral changes in heterozygosity  
348 due to mitotic recombination by plotting the allele frequency of all positions in the genome. First,  
349 looking at the allele frequency of the Postdoc Brewing Co. populations over the sampled  
350 repitches, we observed a marked shift on the right arm of chromosome VIII starting at repitch  
351 number 15, angling towards an allele frequency of 0.50 (Fig 4A). Using the allele frequency of  
352 positions at the terminal end of the chromosome, we calculated that the allele frequency change  
353 reached a frequency of 43.8% by the end of the experiment. From clones isolated from the first  
354 replicate of the Postdoc Brewing Co. experiment, we identified that there were numerous, private  
355 breakpoints in each clone where the allele frequency changed from a haplotype ratio of 3:1 to 2:2  
356 (Fig 4C; full list at Supp. Fig 3). We determined that the signal from the individual clone  
357 breakpoints stacked in the population data to create the angled pattern, with all events sharing a  
358 2:2 ratio at the most distal segment of the chromosome. From these data, we concluded that there  
359 are two chromosomal haplotypes on the right arm of chromosome VIII in a 3:1 major to minor  
360 ratio that are broken up by a mitotic recombination event that occurs numerous times  
361 independently in the population.

362

363 Expanding our analysis to the other replicate populations, we observed that the second  
364 experiment from Postdoc Brewing Co. had a similar angled allele frequency change reaching  
365 25.1% in the population, while all the Elysian Brewing Co. experiments showed sharp *de novo*  
366 breakpoints with different start locations (Fig 4B). Surprisingly, samples from breweries using the  
367 WLP001 strain from White Labs already had a starting fixed allele frequency change before  
368 entering the brewery. When we further investigated the rest of the American strains we found that  
369 the entire branch leading to WLP001 shared this breakpoint, indicating that it had occurred since  
370 its divergence from BRY-96 (Fig 2). Observing the same allele frequency change between  
371 multiple replicates at multiple breweries and independently within the American brewing yeasts,  
372 we concluded that this allele frequency change likely confers an adaptive benefit. From the  
373 Postdoc Brewing Co. replicate 1, for which we sequenced multiple intermediate samples, we  
374 estimated the selective benefit of the allele frequency change would be 5.70%, using a value of  
375 3 generations per repitch.

376  
377 We additionally observed chromosomes XII and XV experiencing convergent mitotic  
378 recombination events in 6 and 4 of the other populations respectively (Supp. Fig 4 and 5). After  
379 noting the mitotic recombination on chromosome XII in the other populations, we noticed that the  
380 first Postdoc Brewing Co. replicate likely had a similar event nearly fix in the population before it  
381 entered the brewery as one of the starting clones, Postdoc Brewing Co., timepoint 1 clone 1, did  
382 not have the allele frequency change. Using the clone that did not have the allele frequency  
383 change, we looked for any variation that experienced a LOH as a result of the mitotic  
384 recombination as this is the most likely source of an adaptive benefit for a mitotic recombination.  
385 However, through computational and manual inspection, we determined that no variation was lost  
386 as a result of the chromosome XII mitotic recombination (though other explanations are possible  
387 as well, such as allele copy number changes). Notably, the right arm of chromosome XII has been

388 observed to have the highest amount of homozygosity among natural and industrial strains of  
389 yeast, potentially due to the presence of the rDNA locus on chromosome XII [3].

390

### 391 **Possible driver genes on chromosome VIII**

392         Wanting to discover the basis of the selective benefit for the chromosome VIII mitotic  
393 recombination events, we also investigated whether any variation was eliminated as a result of  
394 this allele frequency change. We compared several clones from the first Postdoc Brewing Co.  
395 repitch experiment to identify the smallest candidate region in which the allele frequency change  
396 occurred, we then filtered for positions inside of the region where variation is lost (Fig 4C). As the  
397 SacCer3 reference genome does not capture the genome structure at the end of chromosome  
398 VIII and breaks down at the *FLO5* gene (see below), our analysis of lost variation spanned  
399 *YHR180W* to *FLO5* (Fig 4D). There was a single nonsynonymous mutation on one haplotype that  
400 was eliminated in every clone bearing a known allele frequency change and, notably, two clones  
401 without an allele frequency change (PDB26, clones 7 and 12). The mutation (an alanine-to-  
402 asparagine substitution) was found at position 234 in the gene *BAT1*, which encodes a  
403 mitochondrial branched-chain amino acid (BCAA) aminotransferase Bat1 that is critical in the  
404 metabolism of BCAA (valine, leucine, and isoleucine). Due to the importance of Bat1 for BCAA  
405 metabolism even beyond the context of this study, we analyzed the function of the A234D variant  
406 in a companion study (Jirasin Koonthongkaew et al., submitted [36]). Briefly, we discovered that  
407 in an otherwise isogenic background, the *BAT1* variant (*BAT1*<sup>A234D</sup>) leads to the same phenotype  
408 as a null allele in *BAT1*. Specifically, we found that both the null allele and the *BAT1*<sup>A234D</sup> allele  
409 caused a growth defect in minimal medium, reduced levels of intracellular valine and leucine  
410 during the logarithmic and stationary phases, respectively, and produced more fusel alcohols.

411

412            Interestingly, we found that in the Elysian Brewing Co. experiments, *BAT1* did not contain  
413 the A234D allele, but the allele frequency change on chromosome VIII still occurred. Investigating  
414 these populations, we found no additional variation that was lost as a result of the mitotic  
415 recombination, leading us to suspect that there was additional gene content at the end of  
416 chromosome VIII that could be further driving the benefit of the mitotic recombination. However,  
417 the level of structural divergence between the SacCer3 reference genome and the beer strain  
418 was too great to be bridged using short read sequencing, especially due to the repetitive and  
419 paralogous nature of the flocculin gene. As there are no currently available long-read sequencing  
420 data for the American brewing strains, we generated our own using clones isolated from the first  
421 Postdoc Brewing Co. experiment.  
422

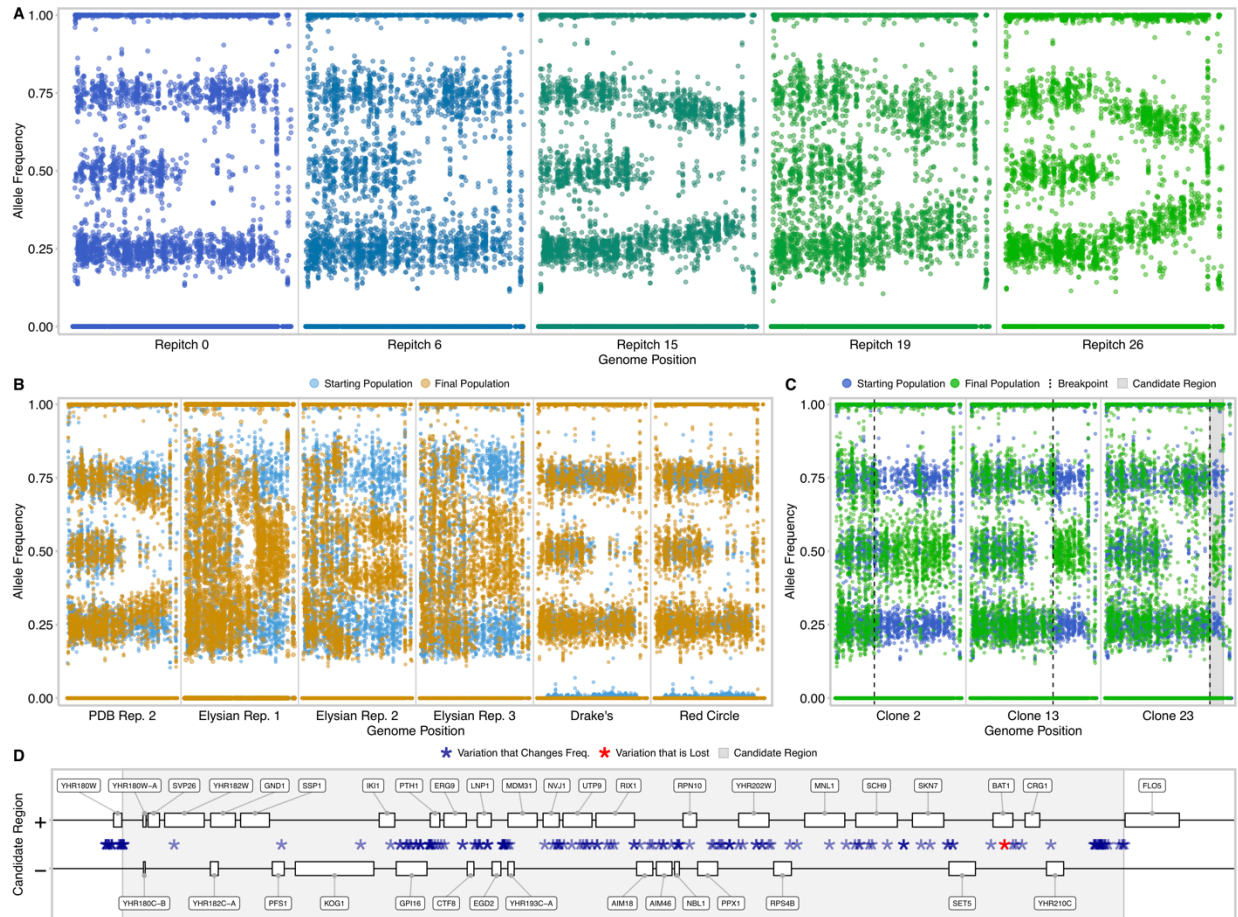

423

424 **Fig 4. Mitotic recombination events spanning the same region recurrently mutated across**

425 **multiple populations (A) Allele frequency plots of serially-repitched populations from the first**

426 **Postdoc Brewing Co. replicate showing an allele frequency change, appearing at the 15th repitch**

427 **and reaching a 43.8% frequency in the population by the 26th repitch. (B) Replicate populations**

428 **from Postdoc Brewing Co., Elysian Brewing Co., Drake's Brewing Co., and Red Circle Brewing**

429 **Co. showing the chromosome VIII allele frequency change. When the sample from Drake's and**

430 **Red Circle were compared to their ancestors, WLP001 and Cali Ale, it was found that the allele**

431 **frequency change had previously occurred and is fixed in the strain. (C) Chromosome VIII of three**

432 **representative clones from the 26th repitch from the first Postdoc Brewing Co. experiment**

433 **showing the different breakpoints of the mitotic recombination event. The region used to detect**

434 **lost variation is highlighted in grey. (D) The minimal region, as detected from clone 23 is displayed**

435 with all known ORFs and variation that is either lost or changes frequency as a result of the mitotic  
436 recombination.

437

### 438 **Oxford Nanopore Technology (ONT) based long-read analysis**

439 Using a MinION sequencer, we generated ONT reads from a clone isolated from the first  
440 time point and three clones from the last time point (each with an allele frequency change). From  
441 these reads we generated individual assemblies from each of the sequencing runs and polished  
442 them for quality using both the ONT and Illumina reads (see methods). We found that multiple  
443 larger scale genome rearrangements had occurred at the telomeres of the beer strains. In  
444 particular, the right end of chromosome VIII had two separate rearrangements versus the  
445 SacCer3 reference that had occurred sometime in the ale brewing yeast past, one matching the  
446 left arm of chromosome I and the other the left end of chromosome IX. Furthermore we found that  
447 the sequence found at the left end of chromosome I had also transferred to the right arm of  
448 chromosome I. Based on previous literature we suspect that these two intragenomic  
449 recombination events have been referred to as *Lg-Flo1* (chimera between *FLO5* and *YAL065C*  
450 originally discovered in lager yeast) and *ILF1* (chimera between *FLO5* and *YIL169C*) [37]. Beyond  
451 the chimeric flocculins, we also discovered that additional gene content, extending to the  
452 telomere, was transferred. From the chromosome IX segment, *HXT12*, *IMA3*, *VTH1*, and *PAU14*  
453 were duplicated to chromosome VIII. From the chromosome I segment, *SEO1* and *PAU8* were  
454 duplicated.

455

456 Using alignments of the ONT reads back to polished assemblies, we established what  
457 variation and haplotypes were attached to which telomeric ends. Specifically, we found that the  
458 chromosome encoding the *BAT1*<sup>A234D</sup> allele is connected to the fragment from chromosome IX.  
459 Additionally, the minor haplotype is connected to the fragment from chromosome I, while the  
460 remaining two chromosomes are connected to the content from chromosome IX. While these

461 observations were confirmed using ONT reads from clone isolates from the Postdoc Brewing Co.  
462 experiment, we have further found that the copy number of the chromosome I fragment containing  
463 *SEO1* increases in both Postdoc Brewing Co. populations and the three Elysian Brewing Co.  
464 populations by the final timepoint, meaning that the copy number of *Lg-FLO1* and *SEO1* likely  
465 both increased in all populations that experienced a chromosome VIII mitotic recombination  
466 (Supp. Fig 6).

467

### 468 **Flocculation**

469 As there was a change in the copy number of *Lg-FLO1*, we tested whether there were any  
470 changes in flocculation rate of clones isolated from the first versus the last time point of the  
471 Postdoc Brewing Co. first replicate experiment. We found that there are no substantial shifts  
472 between clones bearing the chromosome VIII allele frequency change and the clones that do not  
473 (Supp. Fig 7). However, because the experiments were conducted in small scale laboratory  
474 conditions in non-optimal media conditions to test for flocculation of beer brewing strains, more  
475 experimentation is required to conclusively eliminate the possibility that there are differences in  
476 flocculation speed or strength between the clones.

477

### 478 **Growth Phenotypes**

479 Given the potential of an evolutionary benefit of the allele frequency change on  
480 chromosome VIII and the aneuploidy of chromosome V, we tested for any growth changes in  
481 brewers wort of clones bearing these mutations. Fitting growth curves of these yeasts with a linear  
482 model on the period of exponential growth, we analyzed whether there were any changes in the  
483 growth rate or lag time of the clones using a Kruskal-Wallis statistical test. Finding a difference in  
484 the growth rates ( $p\text{-value} = 3.718 \times 10^{-5}$ ), we further probed for differences between clones using  
485 a Mann-Whitney U test. Consequentially, we found that the growth rate of the two clones with the



486 chromosome VIII allele frequency change had a significantly increased growth rate versus the  
487 two clones isolated from the first timepoint (Fig 5).

488

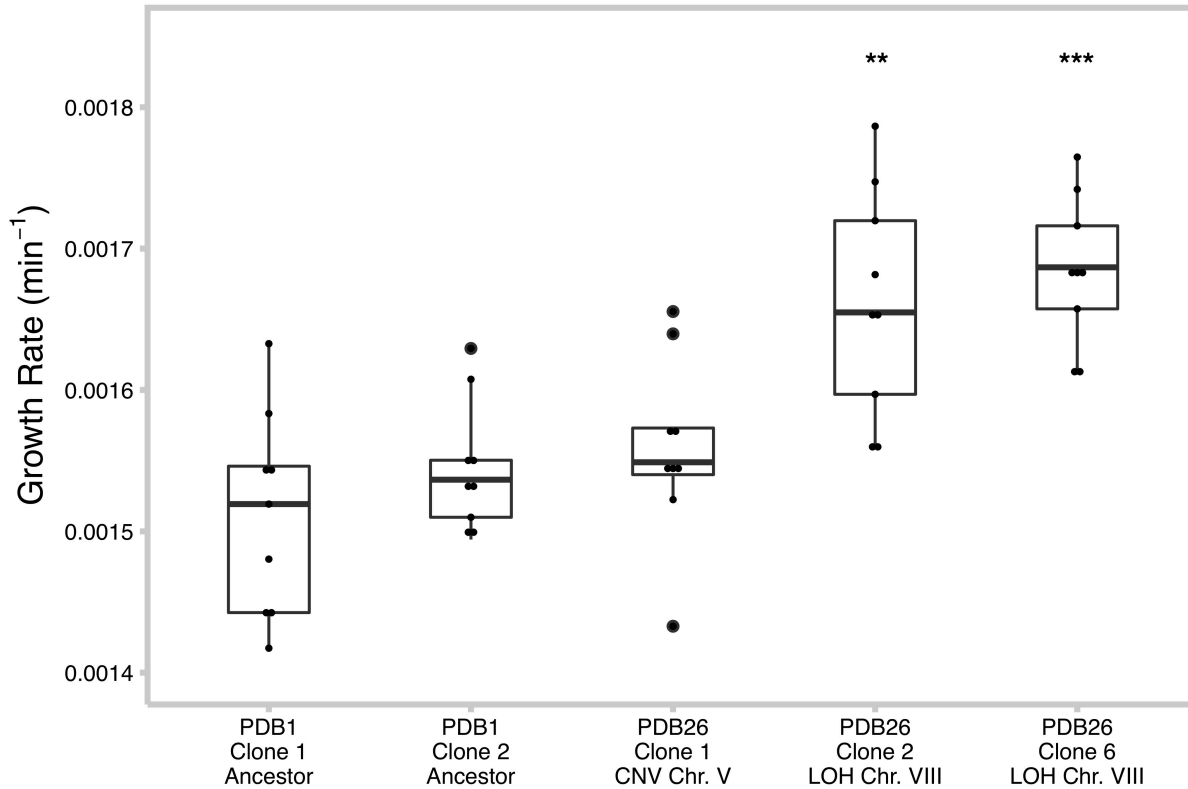

489

490 **Fig 5. Clones bearing a Chr. VIII mitotic recombination grew significantly faster in brewers**

491 **wort.** Growth rates of clones isolated from the first Postdoc Brewing replicate were measured

492 over 24 hours of growth in brewers wort using a plate reader and compared using a Kruskal-

493 Wallis test ( $p$ -value =  $3.718 \times 10^{-5}$ ). Comparisons using a Mann-Whitney U test revealed

494 significant differences between clones bearing the mitotic recombination on chromosome VIII (\*\*

495  $p$ -value < 0.001; \*\*\*  $p$ -value < 0.0001).

496



## 497 **Changes in Sensory Profiles**

498           More than anything, the phenotype that is most important for brewers is the taste of their  
499 beer. To assay for any changes in flavor, we brewed beer with the ancestral strain and two of the  
500 clones described above, and measured both the molecular profile of the beer and the sensory  
501 profile with a crowd-sourced panel from attendees at a Homebrewing Convention. Among the two  
502 fermentation replicates that we tested with chemical profiling, we found that there was an  
503 increased quantity of isobutanol isoamyl acetate and amyl alcohols in the clone lacking the  
504 *BAT1*<sup>A234D</sup> allele (Table 3). Notably, our prior investigation of the A234D allele in a laboratory  
505 strain background conclusively found this same pattern, potentially indicating *BAT1* as the driver  
506 of the metabolite differences (Jirasin Koonthongkaew et al., submitted [36]).

507

508           Additionally, we observed from the specific gravity measurements that the fermentations  
509 with the clone that experienced the mitotic recombination on chromosome VIII (PDB26 clone 6)  
510 potentially did not go to completion when compared to the fermentations from the clones  
511 containing the *BAT1*<sup>A234D</sup> allele (PDB1 clone 1, and PDB26 clone 1). While we don't know if this  
512 is linked to this specific allele or another mutation that the clone has, this feature overwhelmed  
513 the sensory panel, who found the beer to be different in both its maltiness and sweetness (Supp.  
514 Table 6). As well, we found an increase in the production of diacetyl, total and otherwise, but we  
515 do not know definitively whether this was because of reduced ability to clean up the fermented  
516 product due to a fermentation delay. Further replicates and additional testing of clones genetically  
517 manipulated to alter the *BAT1* allele identity are warranted to conclusively test the impact of the  
518 chromosome VIII allele frequency change, with and without the *BAT1*<sup>A234D</sup> allele, on beer  
519 characteristics.

520

521 **Table 3. Sensory analysis of beers brewed with clones from first Postdoc Brewing replicate**

| Sample Name   | BAT1 Status | Ferment | Alcohol (%v/v) | Specific Gravity | Alcohol (%w/w) | pH Value | Acetaldehyde (ppm) | 1-Propanol (ppm) | Isobutanol (ppm) | Amyl Alcohols (ppm) | Iso-Amyl Acetate (ppm) | Diacetyl (ppb) | Total Diacetyl (ppb) | 2,3-Pentanedione (ppb) | Total 2,3-Pentanedione (ppb) |
|---------------|-------------|---------|----------------|------------------|----------------|----------|--------------------|------------------|------------------|---------------------|------------------------|----------------|----------------------|------------------------|------------------------------|
| PDB1 Clone 1  | A234D       | 1       | 5.1            | 1.007552         | 4              | 4.54     | 5.89               | 28.78            | 18.12            | 66.29               | 0.42                   | 32.35          | 44.32                | <10                    | <10                          |
| PDB26 Clone 6 | +           | 1       | 4.72           | 1.010501         | 3.69           | 4.65     | 6.64               | 17.82            | 8.26             | 39.82               | 0.28                   | 74.83          | 116.86               | 11.96                  | 18.83                        |
| PDB26 Clone 1 | A234D       | 1       | 5.1            | 1.007233         | 4              | 4.63     | 3.55               | 24.77            | 15.77            | 63.9                | 0.89                   | 24.06          | 49.47                | <10                    | <10                          |
| PDB1 Clone 1  | A234D       | 2       | 4.56           | 1.015936         | 3.55           | 4.12     | 3.03               | 24.8             | 43.28            | 93.42               | 0.18                   | 73.55          | 89.61                | <10                    | <10                          |
| PDB26 Clone 6 | +           | 2       | 4.5            | 1.016369         | 3.5            | 3.96     | 3.84               | 23.28            | 29.6             | 75.36               | 0.06                   | 81.78          | 121.92               | <10                    | 10.12                        |
| Wort Control  | N/A         | 2       | 0              | 1.050506         | 0              | 4.41     | 0.65               | 5.28             | 0                | 0                   | 0                      | 37.83          | 41.66                | <10                    | <10                          |

522

523

## 524 Discussion

525 Using whole-genome sequencing on yeast serially repitched across four breweries, seven  
 526 populations, and three different strains, we observed the repeated occurrence of convergent  
 527 mutations rising to high frequency in the populations. Notably, we observed multiple types of  
 528 structural variation impacting chromosomes V, VIII, XII, and XV across multiple replicates.  
 529 Through subsequent phenotyping of clones bearing some of these mutations, we have found a  
 530 growth rate benefit in strains carrying the mitotic recombination event on chromosome VIII when  
 531 grown in brewers wort. From these data we have concluded that these mutations are likely  
 532 beneficial and selected for in the brewery, indicating that despite centuries of growth in the  
 533 brewery, ale yeasts continue to show signatures of new adaptations.

534

535 Given the few number of convergent mutations, we sought to determine the driving force  
 536 behind the potential adaptive benefit of the chromosome V copy number change and the  
 537 chromosome VIII mitotic recombination. First, from clone and population sequencing, we were  
 538 able to determine that the copy number change was not haplotype dependent, meaning that the  
 539 benefit likely originated from a dosage balance with the rest of the genome. Second, we found  
 540 that as a result of the mitotic recombination on chromosome VIII a point mutation in *BAT1* in the

541 Postdoc Brewing Co. populations was recurrently lost. Creating the *BAT1*<sup>A234D</sup> allele in a lab strain  
542 and comparing to an isogenic wild-type, we discovered that the mutation led to a number of  
543 phenotypes including a sensitivity to osmotic stress, reduced fermentation ability when grown in  
544 20% glucose, and a growth defect in minimal media (Jirasin Koonthongkaew et al., submitted  
545 [36]). We similarly found that the ale strain clones bearing the *BAT1*<sup>A234D</sup> allele have a growth  
546 defect, indicating its likely influence on the brewing yeast growth and the origin of at least part of  
547 the mitotic recombination benefit. However, the populations from Elysian Brewing Co. did not  
548 have the *BAT1*<sup>A234D</sup> allele, indicating there is likely to be additional adaptive consequences from  
549 the mitotic recombination event. Therefore, we applied long-read sequencing and *de novo*  
550 assembly on the clones from the first Postdoc Brewing Co. replicate to resolve the structure of  
551 the telomeric regions. As a result we found that the mitotic recombination led to a copy number  
552 increase of *Lg-FLO1* and *SEO1* from the minor haplotype and reduction of *ILF1*, *HXT12*, *IMA3*,  
553 *VTH1*, and *PAU14* from the major haplotype. Given the alteration in copy number of multiple  
554 flocculation associated genes, we tested several clones with and without the mitotic  
555 recombination and found no strong difference in the rate that they settled. Considering the lack of  
556 an obvious flocculation difference, we suspect that either our methods to measure flocculation  
557 were not sufficient to detect a significant change or that the benefit was derived from either the  
558 loss of the major haplotype gene copies, or the gain of *SEO1*, whose function is presumed to be  
559 related to nitrogen uptake [38]. Notably, there are six copies of *SEO1* in the genome; however,  
560 this might be coincidental due to its linkage to flocculin-associated gene sequences.

561

562         Considering the long history of beer brewing, one might presume that the yeast  
563 specialized in malt fermentation would already be pre-adapted to the brewery environment.  
564 Especially given that repitching is not a new phenomenon with Louis Pasteur commenting in 1876  
565 on the practice of passaging yeast within and between breweries:

566

567 [T]he wort is never left to ferment spontaneously, the fermentation being invariably  
568 produced by the addition of yeast formed on the spot in a preceding operation, or procured  
569 from some other working brewery, which, again, had at some time been supplied from a  
570 third brewery, which itself had derived it from another, and so on, as far back as the oldest  
571 brewery that can be imagined. ... [T]he interchange of yeasts amongst breweries is a time-  
572 honoured custom, which has been observed in all countries at all periods, as far back as  
573 we can trace the history of brewing. ([39], p. 186)

574

575 However, within our experiments we see multiple mutations overtaking the population in  
576 a relatively short period of time. The most parsimonious answer is that the brewing process has  
577 somehow changed in a way that creates new selective pressures, allowing for novel, highly  
578 beneficial mutations to evolve. One possibility is that the breweries which we partnered with utilize  
579 styles that the 'Chico' yeasts had not been extensively exposed to. Specifically, in the United  
580 States, styles of beer that are high in both final alcohol and hop content have become popular  
581 and are utilized extensively by Postdoc Brewing Co., Drake's Brewing Co. and Elysian Brewing  
582 Co. Seeing as high hop and alcohol content can be stressors, we hypothesize that this could be  
583 one of the contributors to new adaptations. Further experimentation using defined media, varied  
584 in both hop and sugar content, will be able to test this hypothesis. Another possibility is that  
585 industry has shifted in the last several decades towards the use of pure clonal strains and  
586 propagation companies for yeast maintenance versus keeping yeast at scale in the brewery  
587 constantly through continual reuse. Often, to create a stock of a brewing strain the population is  
588 bottlenecked down to a very small size, making a single representation of the population. Through  
589 this process it is likely that mutations that aren't representative of the population and are  
590 potentially deleterious become fixed. Further exacerbating the problem, this process repeats  
591 every time a new propagation company creates their own version of a strain. When the strain is

592 then grown to a massive population size in stressful brewing conditions, there is then selection  
593 for *de novo* reversions of the deleterious mutations. Within our brewing experiments, we have  
594 seen two examples that potentially fit this explanation. First, the copy number of chromosome V  
595 returned to a euploid copy number, which was the hypothesized ancestral state. Second, the  
596 nonsynonymous mutation in *BAT1* was reverted by mitotic recombination. While both of these  
597 hypotheses would potentially explain the source of new adaptations, further work is required to  
598 rigorously test their veracity.

599

600 Another interesting complication for creating a single strain representation of a population  
601 was the occurrence of multiple lineages in the Postdoc Brewing Co. experiments that had the  
602 same or similar mutations within the population. This phenomenon, called clonal interference,  
603 occurs when a new beneficial mutation is unable to completely overtake the population before  
604 another beneficial mutation occurs. This creates competition between the new and old beneficial  
605 mutation, preventing a single lineage from taking over the population. Typically the parameters  
606 that are thought to control the degree of clonal interference during adaptive evolution are the  
607 mutation rate of beneficial mutations, the selective benefit of those mutations, and the population  
608 size [40]. As mentioned above, breweries have an immense population size, creating an ideal  
609 environment for clonal interference. However, it is unclear why in the non-Postdoc Brewing Co.  
610 populations we did not see the same degree of clonal interference. We suspect that the euploid  
611 nature of chromosome V of BRY-96 and the preexisting mitotic recombination in WLP001 may  
612 have allowed for a different population dynamic that led to a single lineage dominating the  
613 population. The other possibility is that the beneficial mutations observed in the non-Postdoc  
614 Brewing Co. populations occurred earlier in their outgrowth, leading to a single lineage dominating  
615 the population.

616

617           Matching with this hypothesis, we found that on multiple instances the yeast entering the  
618 brewery already had undergone some amount of genetic divergence from the stock's genotype.  
619 This is likely due to the number of generations required for a stock of yeast to be grown to a  
620 population size needed by professional brewers. For example, given a 20 hectoliter batch of wort,  
621 the recommendation by White Labs, a prominent propagation company, is to add  $2.4 \times 10^{13}$  cells  
622 of yeast. The absolute minimum number of generations required to reach this number of yeast  
623 from a single cell, assuming a doubling per generation with no death, is 44.4 generations of yeast  
624 growth, which is almost certainly an underestimate. The number of generations occurring in the  
625 brewery, assuming 3 generations per beer fermentation, is 45 generations for 15 serial repitches  
626 and 78 for 26 serial repitches, meaning the growth period at the propagation company constitutes  
627 anywhere from half to a quarter of the yeasts growth in our experiments. As well, because  
628 mutations enter the population at a proportion of one over the total population size, beneficial  
629 mutations that occur earlier in the outgrowth have a higher probability of reaching a high  
630 frequency. Given the number of yeast cells needed by a brewer, it is likely inevitable that some  
631 amount of detectable evolution will occur prior to a pitch even entering the brewery.

632

633           Typically, the professional brewer wants to know how long they can reuse their yeast  
634 before they will start to notice considerable difference in the characteristics of the yeast or beer.  
635 Perhaps the most accurate but somewhat unsatisfying response is that it depends on a number  
636 of factors. Specifically, the timing might be different given the spectrum of adaptive mutations that  
637 a particular strain has access to, the individual mutation rate of that isolate, and the number of  
638 generations that the population was grown at the propagation company. Even given replicates  
639 using the same strain, there is an element of stochastic mutation that can potentially drastically  
640 change how a brewery population evolves. Looking to the future and at methods to have serially  
641 repitched populations with fewer impactful mutations may begin with sequencing more  
642 populations and finding isolates that are better preadapted to the modern brewery. However, this

643 strategy assumes these mutations do not have undesirable tradeoffs on other aspects of  
644 performance, such as on flavor profile. As well, if the possible spectrum of adaptive mutations is  
645 determined for a given strain it may be possible for a commercial service to track the frequency  
646 of these mutations over time and identify when they start impacting the beer. We note that due to  
647 the variability in beer styles employed during most of the time courses analyzed here, we were  
648 unable to rigorously track changes in fermentation characteristics and/or beer quality that may  
649 have happened in tandem with the rise of these mutations.

650

651 In conclusion, we observed multiple independent brewing yeast populations with high-  
652 frequency structural mutations that likely contributed to a change in growth characteristics.  
653 Discovering the likely adaptive benefit of mitotic recombination events in the brewery raises the  
654 possibility that historical ale brewing yeast adaptation was due in part to these kinds of structural  
655 mutations. Notably, the ale yeasts are thought to have originated from an admixture event which  
656 introduced intragenomic variation into the ancestor of the modern brewing strains [8]. Potentially,  
657 ale yeasts have the capacity to adapt to new conditions using mitotic recombination on existing  
658 variation to eliminate or fix deleterious or adaptive alleles respectively. Such events have been  
659 observed within the lager brewing yeasts wherein similar patterns of structural variation have been  
660 linked to phenotypic outcomes [41,42]. Furthermore, multiple mitotic recombination events were  
661 shown to lead to lead to changes in both sugar utilization and flocculation when *de novo* hybrids  
662 between *S. cerevisiae* and *S. eubayanus* were evolved in simulated brewing conditions [20].  
663 Given the prevalence of structural mutations in the history of the genome of brewing yeasts, and  
664 their link to adaptive phenotypic outcomes, further investigation into the consequences of this  
665 variation will likely provide additional insights into their domestication.

666

667 **Materials and Methods**

668 **Evolution in the Brewery**

669         Depending on the brewery, yeast cells were ordered from Wyeast, Imperial Yeast, White  
670 Labs, Escarpment Laboratories, or an internal propagation service (in the case of Elysian Brewing  
671 Co.). For some of the experiments, starting samples were collected either from the shipment or  
672 from the first beer brewed with the yeast. Otherwise these yeast cells were commonly grown for  
673 several generations in low density wort, then transferred into a cycle of several ale beer recipes  
674 ranging from barley wine to double IPAs. The precise recipe and conditions are proprietary for  
675 some of the breweries, however Postdoc Brewing Co. has provided the style in which the yeast  
676 were passaged through (Supp. Table 1). For the Postdoc Brewing Co. samples, they were  
677 collected from the middle of the flocculated yeast after the runnings of hop and protein particulate  
678 was disposed of. Once samples were collected, they were stored at 4°C in a sterile, airtight  
679 container until transfer to the laboratory was possible. Upon arrival in the laboratory, the samples  
680 were thoroughly mixed and 1 mL was transferred to a 25% glycerol stock that was subsequently  
681 frozen at -70°C.

682

683 **Short-read genome sequencing**

684         Populations of yeast cells, previously stored in 25% glycerol at -70°C were transferred to  
685 deionized water (diH<sub>2</sub>O) and measured for cell density using a hemocytometer. Based on cell  
686 density counts in the diH<sub>2</sub>O, the cell suspensions were diluted and plated to collect approximately  
687 1,000 independent yeast colonies, grown for 4 days on yeast extract peptone dextrose (YEPD)  
688 plates with 2% glucose and 1.7% agar at room temperature. These plates were scraped for cells  
689 with a sterile glass rod, concentrated by centrifugation, and washed in diH<sub>2</sub>O. DNA was then  
690 extracted from the cell pellets using a modified Hoffman-Winston preparation [43].

691



692           Single clone isolates were generated from a population glycerol stock. In short, the  
693 brewery populations were streaked onto a YEPD plate and grown at room temperature. A single  
694 colony was isolated and grown overnight in 5 mL of YEPD liquid medium with rotation. A portion  
695 of the overnight culture was stored in a 25% glycerol stock for archiving and subsequent analysis.  
696 The remaining cells were concentrated, washed with diH<sub>2</sub>O and had their DNA extracted with a  
697 modified Hoffman-Winston preparation [43]. Clones 13 through 23 were selected for sequencing  
698 based on their likelihood for bearing a chromosome VIII allele frequency change from genotyping  
699 using PCR and Sanger sequencing for a SNP frequency within a variable region on the end of  
700 the chromosome.

701  
702           After measuring the concentration of DNA using a Qubit Fluorometer (Thermo Fisher  
703 Scientific), dual-indexed Illumina libraries were generated using a Nextera sample preparation kit  
704 (Illumina, Inc.) with 50 ng of input DNA. The genomic libraries were sequenced using 150-bp  
705 paired end sequencing on an Illumina NextSeq 500 using the manufacturer's recommended  
706 protocols.

707

### 708 **Whole genome analysis**

709           The Illumina reads were demultiplexed using bcl2fastq with default parameters. The reads  
710 were then aligned to the SacCer3 reference genome (R64-2-1) using BWA-mem (version 0.7.15)  
711 [44]. The alignments, after being sorted and indexed with SAMtools [45] (version 1.9) were  
712 marked for duplicates using Picard Tools (version 2.6.0). When libraries were sequenced on  
713 multiple lanes or runs, the alignments were combined using SAMtools. Afterwards, the alignments  
714 had their InDels realigned using GATK (version 3.7).

715

716           Short mutations such as SNPs and InDels were then called using three separate variant  
717 calling software packages. First, BCFtools call using modified input parameters was used.

718 Second, FreeBayes (version 1.0.2-6-g3ce827d) [46] using input parameters (`--pooled-discrete --`  
719 `pooled-continuous --report-genotype-likelihood-max --allelebalance-priors-off --min-alternate-`  
720 `fraction 0.1`) were used to call both SNPs and InDels. Finally, in a paired mode with the sample's  
721 ancestor, LoFreq was used to call SNPs [47]. For all of the variant callers, BEDtools was used to  
722 filter the variants called for a sample versus its ancestor [48]. Each variant file was subsequently  
723 filtered using standard parameters that are listed in Supp. Table 7. The three variant files were  
724 then filtered to exclude overlaps of the same variant and combined into one file using a custom  
725 script. Afterwards, the annotation and impact of the variants were determined using a script  
726 previously published in [49]. Finally, each variant that passed all filters was manually checked for  
727 its authenticity in the Integrative Genomics Viewer (IGV) [50]. When variant calls from BCFtools  
728 call exceeded 300 variants, these files were ignored, as they were found to contain primarily false-  
729 positives through manual inspection and comparisons with other software.

730

731 As noted earlier, there are multiple haplotypes containing varying degrees of shared  
732 variation between homologous chromosomes. To quantify and observe the degree that this  
733 variation has been altered through mitotic recombination, allele frequency was calculated and  
734 plotted for all genomic coordinates. Briefly, from the previously generated alignments, variant calls  
735 were generated using the GATK (version 3.7) HaplotypeCaller. These variant calls were passed  
736 to GATK VariantToTable and modified using an in-house java script into a per base allele ratio  
737 between a reference and alternate allele. Subsequently, the allele frequency was plotted using  
738 an R script with ggplot2. Changes in the ratios between haplotypes were visually determined  
739 through inspection of these plots. Precise values on the proportion of the allele frequency change  
740 of chromosome VIII in the population were generated using an average of the change in allele  
741 frequency of a set of SNPs that were highly representative of the mitotic recombination events in  
742 the clones at the end of chromosome VIII. These values were then used to calculate the selective  
743 benefit of the chromosome VIII allele frequency.

744

745           Using the alignments listed above, the copy number of the genome was determined and  
746 plotted using an in-house script. Briefly, the total genome coverage was calculated using GATK  
747 (version 2.6.5) DepthOfCoverage. Next, the per window average coverage across the genome  
748 was calculated using the command-line tools version of IGVtools. These files were combined  
749 using a python script to generate a normalized coverage measure. As many of the samples  
750 included a ‘wavy’ coverage in which the coverage varied across the genome in an inconsistent  
751 and seemingly random pattern, the per ORF coverage was unable to be accurately determined.  
752 In the cases that the coverage was too ‘wavy’ to accurately determine the coverage, the allele  
753 frequency plots that are described above were used to determine the copy number as the per  
754 allele coverage remained unchanged by the ‘wavy’ sequencing artifact.

755

## 756 **Phylogenomic analysis**

757           In order to properly understand the diversity and previous evolutionary history of the  
758 American brewing strains, all publicly available brewing strains whole genome sequencing were  
759 processed into a phylogenetic representation. Capturing the most amount of American diversity  
760 possible, some strains that had not previously been sequenced, but suspected to be part of the  
761 American yeast group (due to tips from professional and amateur brewers) were ordered and  
762 kindly donated from a variety of yeast propagation companies. As described above, the strains  
763 had their DNA extracted and sequenced using the paired-end Illumina technology. All of the  
764 sequencing reads were aligned using a similar strategy as previously described above with slight  
765 modifications, and called for variants in the GVCF mode using GATK (version 4.1.1.0)  
766 HaplotypeCaller on regions of high confidence (excluding the first and last 50 kb of each  
767 chromosome to avoid poorly assembled telomeric sequences). Individual variant calls were  
768 collected and jointly genotyped using GATK GenomicsDBImport and GenotypeGVCFs and  
769 filtered with GATK (version 4.1.3.0). Removing the influence of ancestral variation lost by mitotic

770 recombination, the SNPs from the sample excluding BE051 were then filtered by SNPs called  
771 from BE051 using BEDtools [48]. The SNP calls were then converted into two concatenated fasta  
772 files wherein the first fasta was the SacCer3 reference genome with the reference allele as listed  
773 if the strain was either heterozygous or homozygous for the reference allele. The second fasta  
774 also contained the SacCer3 allele unless a heterozygous or homozygous variant position was  
775 detected in which case the alternate allele was outputted. This task was done using BCFtools.  
776 The concatenated fastas from all of the American brewing strains were passed to IQTree2 to  
777 generate a maximum-likelihood tree using GTR<sub>4</sub> + gamma model [51]. The tree was then modified  
778 for aesthetics and annotation using iTOL [52].

779

780 Comparisons between the ‘Chico’ yeasts and BRY-96 for determination of the ancestry of  
781 the ‘Chico’ yeasts was done using the aforementioned SNP calls. First, the union of the SNPs  
782 called in WLP001 and Wyeast 1056 was generated using BEDtools. Second, the mutations  
783 unique to BRY-96 when compared with that union were generated. Finally, the remaining SNPs  
784 from BRY-96 were manually inspected for veracity using IGV.

785

## 786 **Flocculation**

787 The rate of flocculation was quantitatively measured similar to previously reported [53].  
788 Briefly, yeast of the appropriate genotype, plated on a 2% YPD plate were grown from a single  
789 colony in 5 mL of 2% YPD liquid medium for 72 hours at 30°C with rotation. The yeast cultures  
790 were then vortexed for a minimum of 5 seconds to ensure complete resuspension. Photographs  
791 were then taken of the yeast after 60 minutes while the culture tubes remained undisturbed.  
792 Afterwards, using a semi-automated script written for ImageJ [54], the images were converted to  
793 black and white, and the plot profiles of the culture tube’s grey intensity were collected from the  
794 bottom of the tube to the meniscus. Next, to determine the degree of settling in an unbiased  
795 manner, an automated script written in python was used to find the point in the culture that the

796 intensity reached half of the maximum grey value. The point at which the yeast had flocculated to  
797 in the culture tube after 60 minutes was used to create a ratio based on the total length of the  
798 culture. Three measurements were taken per culture and the average of these measurements  
799 was reported. Two biological replicates were conducted from independent colonies.

800

### 801 **Brewers wort media**

802 The brewers wort media, utilized for the growth phenotyping and fermentation analysis  
803 was made as previously mentioned in [55] with slight modification. Briefly, 320 grams of amber  
804 liquid malt extract from Breiss Malt and Ingredients Co were mixed with 1.5 liters of distilled water  
805 and boiled for an hour. Fifteen minutes before the boil finished, 0.2 gram of the Wyeast Beer  
806 Nutrient Blend was added to the mixture according to the manufacture's guidelines. After the wort  
807 had been chilled to a workable temperature, the specific gravity was measured using a  
808 hydrometer (and the value read was corrected based on the temperature), and the media was  
809 passed through fresh Melitta filters to remove any large coagulants. Next, the media was passed  
810 through a 0.45 micron filter (Nalgene 500mL Rapid-Flow Bottle Top Filters) to completely sterilize  
811 the media. The specific gravity of all batches used herein were found to be the same value of  
812 1.050.

813

### 814 **Growth phenotypes**

815 The growth characteristic of clones isolated from the first replicate population from  
816 Postdoc Brewing Co. was measured. First, single yeast colonies from a 2% YPD plate were grown  
817 in wort medium for 48 hours with rotation. Next the optical density of the cultures was measured  
818 at 600 nm (OD600). Each culture was then diluted in an appropriate amount of wort to reach a  
819 final OD600 of 0.1. The back-diluted cultures were further transferred to a 96-well plate at a  
820 volume of 200 microliters per well. Using a Biotek Synergy H1 plate reader, the OD600 of the 96-  
821 well plate was measured every 15 minutes for 24-48 hours while shaking in a double orbital

822 pattern at room temperature. Utilizing a script written in the R programming language, the growth  
823 data from the plate reader were analyzed using the growthrates package. Employing the  
824 growthrates implementation of fitting linear models to the exponential growth period outlined in  
825 [56], we extracted the maximum growth rate of the clones and the length of the lag growth period.  
826 To determine whether there was a difference in the growth rates between clones, we first  
827 conducted a Kruskal Wallis rank sum test. Further testing of differences between clone growth  
828 rates was done using Mann-Whitney tests.

829

### 830 **Sensory profiling**

831 The isolated clones from the first Postdoc Brewing replicate were tested for differences in  
832 the production of flavor compounds and the effect these compounds had on the beer sensory  
833 profile. First, two separate beer batches (beer batches 1 and 2) were generated from  
834 fermentations carried out either at Postdoc Brewing (using an all grain pale ale recipe) or in the  
835 laboratory (using the malt extract wort mentioned earlier). The yeast that fermented the beer were  
836 grown in the laboratory from single colonies to the desired cell count in 2% YEPD liquid medium  
837 with shaking. For the first and second beer batch, the yeast were concentrated with centrifugation  
838 and pitched into the wort at a rate of  $3.5 \times 10^5$  and  $1.0 \times 10^6$  cells per degree of plato respectively.

839

840 Second, both beer batches were submitted to White Laboratories for analytical services  
841 including gas chromatography measurements of a number of flavor compounds and  
842 measurements of alcohol percentage and specific gravity. Next, the beers from batch 1 were  
843 submitted to an untrained judging panel (n=95) at the Homebrew Con 2018, who used a  
844 standardized beer scoresheet from the Beer Judge Certification Program to analyze the profile of  
845 the beer. The identity of the beers were kept masked from the participants while they filled out  
846 their analysis. Afterwards, the scoresheets were aggregated and analyzed for differences using  
847 a Kruskal Wallis rank sum statistical test.

848

### 849 **Oxford nanopore sequencing**

850 Yeast cell cultures were grown overnight at 30°C in 20 mL of YPD medium to early  
851 stationary phase before cells were harvested by centrifugation. Total genomic DNA was then  
852 extracted using the QIAGEN Genomic-tip 100/G according to the manufacturer's instructions. The  
853 extracted DNA was barcoded using the EXP-NBD104 native barcoding kit (Oxford Nanopore  
854 Technologies) and the concentration of the barcoded DNA was measured with a Qubit 1.0  
855 fluorometer (Thermo Fisher Scientific). The barcoded DNA samples were pooled with an equal  
856 concentration for each strain. Using the SQK-LSK109 ligation sequencing kit (Oxford Nanopore  
857 Technologies), the adapters were ligated on the barcoded DNA. Finally, the sequencing mix was  
858 added to the R9.3 flowcell for a 48 hour run.

859

### 860 **Assembly generation and polishing**

861 The ONT reads were demultiplexed using Guppy with default parameters. The adapters  
862 on the raw reads were removed using Porechop. Afterwards, each sample was independently run  
863 through SMARTdenovo with default parameters to generate a draft genome assembly. To  
864 improve the quality of the assembly, the draft sequences were first run through racon then  
865 medaka. Next they were refined using pilon and the Illumina reads previously generated for the  
866 four clones sequenced on the MinION. The identity of the contigs was determined through  
867 pairwise alignment of the contigs (masked with RepeatMasker) to the SacCer3 reference genome  
868 using Minimap2 and plotted using an R package called DotPlotly. Confirmation of the contig  
869 identity, and the inferred identity of the ancestor was done using a combination of Minimap2  
870 alignments of the SacCer3 reference ORFs, SacCer3 reference sequence, ONT reads, and  
871 Illumina reads, all visualized in IGV.

872

873 **Data availability**

874 All whole-genome sequencing data was uploaded to <https://www.ncbi.nlm.nih.gov/sra> with the  
875 BioProject accession number: PRJNA641752.

876

877 **Acknowledgments**

878 Massive thanks to Professor Mary Kuhner for advice on best practices for complicated  
879 phylogenetic inference. Sequencing analysis consultation was graciously provided by Mitchell  
880 Vollger and Dr. Glennis Logsdon. Thanks to Jess Caudill at Imperial Yeast for insight to the yeast  
881 propagation industry. Thanks to the attendees of Homebrew Con 2018 who participated in the  
882 sensory analysis. Thanks to Karen Fortmann and White Labs for metabolite profiling. This  
883 research was only made possible by the generous contribution of numerous unlisted, but greatly  
884 appreciated brewers, historians, and researchers. This work was funded by grant 1516330 from  
885 the National Science Foundation. This material is based in part upon work supported by the  
886 National Science Foundation under Cooperative Agreement No. DBI-0939454. Any opinions,  
887 findings, and conclusions or recommendations expressed in this material are those of the  
888 author(s) and do not necessarily reflect the views of the National Science Foundation. The  
889 research of MJD was supported in part by a Faculty Scholar grant from the Howard Hughes  
890 Medical Institute. CRLL was supported by T32 HG000035 from the National Human Genome  
891 Research Institute. JS was supported by the Agence Nationale de la Recherche (GM101091-01)  
892 and the European Research Council (ERC Consolidator grant 772505). AT was supported by a  
893 grant from the Ministère de l'Enseignement Supérieur et de la Recherche. YT was supported by  
894 a Grant-in-Aid for Research Activity start-up (19K21144) from the Japan Society for the Promotion  
895 of Science (JSPS)

896



897 **Competing Interests**

898 We declare a financial interest in the success of the breweries associated with the authors of this  
899 manuscript. No direct funding from these breweries went into the research herein presented  
900 beyond the production of the beers sampled. Otherwise, we declare no competing interests.

901

902 **References**

903 1. Marsit S, Leducq J-B, Durand É, Marchant A, Filteau M, Landry CR. Evolutionary biology  
904 through the lens of budding yeast comparative genomics. *Nat Rev Genet.* 2017;18: 581–  
905 598. doi:10.1038/nrg.2017.49

906 2. Gallone B, Steensels J, Prah T, Soriaga L, Saels V, Herrera-Malaver B, et al.  
907 Domestication and Divergence of *Saccharomyces cerevisiae* Beer Yeasts. *Cell.*  
908 2016;166: 1397-1410.e16. doi:10.1016/J.CELL.2016.08.020

909 3. Peter J, De Chiara M, Friedrich A, Yue JX, Pflieger D, Bergström A, et al. Genome  
910 evolution across 1,011 *Saccharomyces cerevisiae* isolates. *Nature.* 2018;556: 339–344.  
911 doi:10.1038/s41586-018-0030-5

912 4. Strobe PK, Skelly DA, Kozmin SG, Mahadevan G, Stone EA, Magwene PM, et al. The  
913 100-genomes strains, an *S. cerevisiae* resource that illuminates its natural phenotypic  
914 and genotypic variation and emergence as an opportunistic pathogen. *Genome Res.*  
915 2015;25: 762–74. doi:10.1101/gr.185538.114

916 5. Gonçalves M, Pontes A, Almeida P, Barbosa R, Serra M, Libkind D, et al. Distinct  
917 Domestication Trajectories in Top-Fermenting Beer Yeasts and Wine Yeasts. *Curr Biol.*

- 918 2016;26: 2750–2761. doi:10.1016/j.cub.2016.08.040
- 919 6. Libkind D, Hittinger CT, Valério E, Gonçalves C, Dover J, Johnston M, et al. Microbe  
920 domestication and the identification of the wild genetic stock of lager-brewing yeast. Proc  
921 Natl Acad Sci U S A. 2011;108: 14539–44. doi:10.1073/pnas.1105430108
- 922 7. Preiss R, Tyrawa C, Krogerus K, Garshol LM, van der Merwe G. Traditional Norwegian  
923 Kveik Are a Genetically Distinct Group of Domesticated *Saccharomyces cerevisiae*  
924 Brewing Yeasts. Front Microbiol. 2018;9: 2137. doi:10.3389/fmicb.2018.02137
- 925 8. Fay JC, Liu P, Ong GT, Dunham MJ, Cromie GA, Jeffery EW, et al. A polyploid admixed  
926 origin of beer yeasts derived from European and Asian wine populations. PLOS Biol.  
927 2019;17: e3000147. doi:10.1371/journal.pbio.3000147
- 928 9. Mukai N, Masaki K, Fujii T, Iefuji H. Single nucleotide polymorphisms of *PAD1* and *FDC1*  
929 show a positive relationship with ferulic acid decarboxylation ability among industrial  
930 yeasts used in alcoholic beverage production. J Biosci Bioeng. 2014;118: 50–55.  
931 doi:10.1016/j.jbiosc.2013.12.017
- 932 10. Chen P, Dong J, Yin H, Bao X, Chen L, He Y, et al. Single nucleotide polymorphisms and  
933 transcription analysis of genes involved in ferulic acid decarboxylation among different  
934 beer yeasts. J Inst Brew. 2015;121: 481–489. doi:10.1002/jib.249
- 935 11. Will JL, Kim HS, Clarke J, Painter JC, Fay JC, Gasch AP. Incipient balancing selection  
936 through adaptive loss of aquaporins in natural *Saccharomyces cerevisiae* populations.  
937 PLoS Genet. 2010;6. doi:10.1371/journal.pgen.1000893

- 938 12. Mayer VW, Aguilera A. High levels of chromosome instability in polyploids of  
939 *Saccharomyces cerevisiae*. *Mutat Res Mol Mech Mutagen*. 1990;231: 177–186.  
940 doi:10.1016/0027-5107(90)90024-X
- 941 13. Nakao Y, Kanamori T, Itoh T, Kodama Y, Rainieri S, Nakamura N, et al. Genome  
942 sequence of the lager brewing yeast, an interspecies hybrid. *DNA Res*. 2009;16: 115–  
943 129. doi:10.1093/dnares/dsp003
- 944 14. Salazar AN, Gorter De Vries AR, Van Den Broek M, Brouwers N, De La Torre Cortès P,  
945 Kuijpers NGA, et al. Chromosome level assembly and comparative genome analysis  
946 confirm lager-brewing yeasts originated from a single hybridization. *BMC Genomics*.  
947 2019;20. doi:10.1186/s12864-019-6263-3
- 948 15. Monerawela C, James TC, Wolfe KH, Bond U. Loss of lager specific genes and  
949 subtelomeric regions define two different *Saccharomyces cerevisiae* lineages for  
950 *Saccharomyces pastorianus* Group I and II strains. *FEMS Yeast Res*. 2015;15.  
951 doi:10.1093/femsyr/fou008
- 952 16. Smukowski Heil CS, DeSevo CG, Pai DA, Tucker CM, Hoang ML, Dunham MJ. Loss of  
953 Heterozygosity Drives Adaptation in Hybrid Yeast. *Mol Biol Evol*. 2017;34: 1596–1612.  
954 doi:10.1093/molbev/msx098
- 955 17. Smukowski Heil CS, Large CRL, Patterson K, Hickey ASM, Yeh CLC, Dunham MJ.  
956 Temperature preference can bias parental genome retention during hybrid evolution.  
957 *PLoS Genet*. 2019;15: e1008383. doi:10.1371/journal.pgen.1008383
- 958 18. James TY, Michelotti LA, Glasco AD, Clemons RA, Powers RA, James ES, et al.

- 959           Adaptation by loss of heterozygosity in *Saccharomyces cerevisiae* clones under divergent  
960           selection. *Genetics*. 2019;213: 665–683. doi:10.1534/genetics.119.302411
- 961   19.   Dunn B, Paulish T, Stanbery A, Piotrowski J, Koniges G, Kroll E, et al. Recurrent  
962           Rearrangement during Adaptive Evolution in an Interspecific Yeast Hybrid Suggests a  
963           Model for Rapid Introgression. *PLoS Genet*. 2013;9. doi:10.1371/journal.pgen.1003366
- 964   20.   Gorter De Vries AR, Voskamp MA, Van Aalst ACA, Kristensen LH, Jansen L, Van Den  
965           Broek M, et al. Laboratory evolution of a *Saccharomyces cerevisiae* × *S. eubayanus*  
966           hybrid under simulated lager-brewing conditions. *Front Genet*. 2019;10.  
967           doi:10.3389/fgene.2019.00242
- 968   21.   Bennett RJ, Forche A, Berman J. Rapid mechanisms for generating genome diversity:  
969           Whole ploidy shifts, aneuploidy, and loss of heterozygosity. *Cold Spring Harb Perspect*  
970           *Med*. 2014;4. doi:10.1101/cshperspect.a019604
- 971   22.   Ryland GL, Doyle MA, Goode D, Boyle SE, Choong DYH, Rowley SM, et al. Loss of  
972           heterozygosity: What is it good for? *BMC Med Genomics*. 2015;8. doi:10.1186/s12920-  
973           015-0123-z
- 974   23.   Lauer S, Avecilla G, Spealman P, Sethia G, Brandt N, Levy SF, et al. Single-cell copy  
975           number variant detection reveals the dynamics and diversity of adaptation. *PLoS Biol*.  
976           2018;16: e3000069. doi:10.1371/journal.pbio.3000069
- 977   24.   Selmecki AM, Maruvka YE, Richmond PA, Guillet M, Shores N, Sorenson AL, et al.  
978           Polyploidy can drive rapid adaptation in yeast. *Nature*. 2015;519.  
979           doi:10.1038/nature14187

- 980 25. Smart KA, Whisker SW. Effect of Serial Repitching on the Fermentation Properties and  
981 Condition of Brewing Yeast. *J Am Soc Brew Chem.* 1996;54: 41–44. doi:10.1094/ASBCJ-  
982 54-0041
- 983 26. Jenkins CL, Kennedy AI, Hodgson JA, Thurston P, Smart KA. Impact of Serial Repitching  
984 on Lager Brewing Yeast Quality. *J Am Soc Brew Chem.* 2003;61: 1–9.  
985 doi:10.1094/ASBCJ-61-0001
- 986 27. Kobayashi M, Shimizu H, Shioya S. Physiological analysis of yeast cells by flow  
987 cytometry during serial-repitching of low-malt beer fermentation. *J Biosci Bioeng.*  
988 2007;103: 451–456. doi:10.1263/jbb.103.451
- 989 28. Powell C, Fischborn T, Id CREF, Wau ML, Library S. Serial Repitching of Dried Lager  
990 Yeast. *J Am Soc Brew Chem.* 2010;68: 48–56. doi:10.1094/ASBCJ-2010-0125-01
- 991 29. Verbelen PJ, Dekoninck TML, Saerens SMG, Van Mulders SE, Thevelein JM, Delvaux  
992 FR. Impact of pitching rate on yeast fermentation performance and beer flavour. *Appl*  
993 *Microbiol Biotechnol.* 2009;82: 155–167. doi:10.1007/s00253-008-1779-5
- 994 30. Thorne RSW. Some Observations on Yeast Mutation During Continuous Fermentation. *J*  
995 *Inst Brew.* 1968;74: 516–524. doi:10.1002/j.2050-0416.1968.tb03167.x
- 996 31. Sato M, Watari J, Shinotsuka K. Genetic Instability in Flocculation of Bottom-Fermenting  
997 Yeast. *J Am Soc Brew Chem.* 2001;59: 130–134. doi:10.1094/ASBCJ-59-0130
- 998 32. Powell CD, Diacetis AN. Long term serial repitching and the genetic and phenotypic  
999 stability of brewer's yeast. *J Inst Brew.* 2007;113: 67–74. doi:10.1002/j.2050-

- 1000 0416.2007.tb00258.x
- 1001 33. Deželak M, Gebremariam MM, Čadež N, Zupan J, Raspor P, Zarnkow M, et al. The  
1002 influence of serial repitching of *Saccharomyces pastorianus* on its karyotype and protein  
1003 profile during the fermentation of gluten-free buckwheat and quinoa wort. *Int J Food*  
1004 *Microbiol.* 2014;185: 93–102. doi:10.1016/j.ijfoodmicro.2014.05.023
- 1005 34. Gibson B, Vidgren V, Peddinti G, Krogerus K. Diacetyl control during brewery  
1006 fermentation via adaptive laboratory engineering of the lager yeast *Saccharomyces*  
1007 *pastorianus*. *J Ind Microbiol Biotechnol.* 2018;45: 1103–1112. doi:10.1007/s10295-018-  
1008 2087-4
- 1009 35. Aouizerat T, Gelman D, Szitenberg A, Gutman I, Glazer S, Reich E, et al. Eukaryotic  
1010 Adaptation to Years-Long Starvation Resembles that of Bacteria. *iScience.* 2019;19:  
1011 545–558. doi:10.1016/j.isci.2019.08.002
- 1012 36. Koonthongkaew J, Toyokawa Y, Ohashi M, Large C, Dunham M, Takagi H. Effects of the  
1013 Ala234Asp substitution in the mitochondrial branched-chain amino acid aminotransferase  
1014 Bat1 on the production of branched-chain amino acids and fusel alcohols in  
1015 *Saccharomyces cerevisiae*. [Submitted April 24, 2020]
- 1016 37. Ogata T, Izumikawa M, Kohno K, Shibata K. Chromosomal location of Lg-*FLO1* in  
1017 bottom-fermenting yeast and the *FLO5* locus of industrial yeast. *J Appl Microbiol.*  
1018 2008;105: 1186–1198. doi:10.1111/j.1365-2672.2008.03852.x
- 1019 38. Isnard AD, Thomas D, Surdin-Kerjan Y. The study of methionine uptake in  
1020 *Saccharomyces cerevisiae* reveals a new family of amino acid permeases. *J Mol Biol.*

- 1021 1996;262: 473–484. doi:10.1006/jmbi.1996.0529
- 1022 39. Pasteur L. Studies on Fermentation: The diseases of beer, their causes, and the means  
1023 of preventing them. London: Macmillan and Co.; 1879.
- 1024 40. Gerrish PJ, Lenski RE. The fate of competing beneficial mutations in an asexual  
1025 population. *Genetica*. 1998;102/103: 127–144. doi:10.1023/A:1017067816551
- 1026 41. Usher J, Bond U. Recombination between homoeologous chromosomes of lager yeasts  
1027 leads to loss of function of the hybrid *GPH1* gene. *Appl Environ Microbiol*. 2009;75:  
1028 4573–4579. doi:10.1128/AEM.00351-09
- 1029 42. Gallone B, Steensels J, Mertens S, Dzialo MC, Gordon JL, Wauters R, et al. Interspecific  
1030 hybridization facilitates niche adaptation in beer yeast. *Nat Ecol Evol*. 2019;3: 1562–  
1031 1575. doi:10.1038/s41559-019-0997-9
- 1032 43. Hoffman CS, Winston F. A ten-minute DNA preparation from yeast efficiently releases  
1033 autonomous plasmids for transformiaon of *Escherichia coli*. *Gene*. 1987;57: 267–272.  
1034 doi:10.1016/0378-1119(87)90131-4
- 1035 44. Li H. Aligning sequence reads, clone sequences and assembly contigs with BWA-MEM.  
1036 arXiv: 1303.3997v2 [Preprint]. 2013 [cited 26 Jun 2020]. Available:  
1037 <https://arxiv.org/abs/1303.3997>
- 1038 45. Li H, Handsaker B, Wysoker A, Fennell T, Ruan J, Homer N, et al. The Sequence  
1039 Alignment/Map format and SAMtools. *Bioinformatics*. 2009;25: 2078–2079.  
1040 doi:10.1093/bioinformatics/btp352

- 1041 46. Garrison E, Marth G. Haplotype-based variant detection from short-read sequencing.  
1042 arXiv: 1207.3907v2 [Preprint]. 2012 [cited 26 Jun 2020]. Available:  
1043 <http://arxiv.org/abs/1207.3907>
- 1044 47. Wilm A, Aw PPK, Bertrand D, Yeo GHT, Ong SH, Wong CH, et al. LoFreq: A sequence-  
1045 quality aware, ultra-sensitive variant caller for uncovering cell-population heterogeneity  
1046 from high-throughput sequencing datasets. *Nucleic Acids Res.* 2012;40: 11189–11201.  
1047 doi:10.1093/nar/gks918
- 1048 48. Quinlan AR, Hall IM. BEDTools: A flexible suite of utilities for comparing genomic  
1049 features. *Bioinformatics.* 2010;26: 841–842. doi:10.1093/bioinformatics/btq033
- 1050 49. Pashkova N, Gakhar L, Winistorfer SC, Sunshine AB, Rich M, Dunham MJ, et al. The  
1051 yeast alix homolog *bro1* functions as a ubiquitin receptor for protein sorting into  
1052 multivesicular endosomes. *Dev Cell.* 2013;25: 520–533.  
1053 doi:10.1016/j.devcel.2013.04.007
- 1054 50. Robinson JT, Thorvaldsdóttir H, Winckler W, Guttman M, Lander ES, Getz G, et al.  
1055 Integrative genomics viewer. *Nat Biotechnol.* 2011;29: 24–26. doi:10.1038/nbt.1754
- 1056 51. Minh BQ, Schmidt H, Chernomor O, Schrempf D, Woodhams M, von Haeseler A, et al.  
1057 IQ-TREE 2: New models and efficient methods for phylogenetic inference in the genomic  
1058 era. *Mol Biol Evol.* 2019;47: 1530-1534. doi: 10.1093/molbev/msaa015
- 1059 52. Letunic I, Bork P. Interactive Tree of Life (iTOL) v4: Recent updates and new  
1060 developments. *Nucleic Acids Res.* 2019;47. doi:10.1093/nar/gkz239



- 1061 53. Hope EA, Dunham MJ. Ploidy-regulated variation in biofilm-related phenotypes in natural  
1062 isolates of *Saccharomyces cerevisiae*. G3 (Bethesda). 2014;4: 1773–1786.  
1063 doi:10.1534/g3.114.013250
- 1064 54. Schindelin J, Arganda-Carreras I, Frise E, Kaynig V, Longair M, Pietzsch T, et al. Fiji: An  
1065 open-source platform for biological-image analysis. Nat Methods. 2012;9: 676–682.  
1066 doi:10.1038/nmeth.2019
- 1067 55. Smukowski Heil C, Burton JN, Liachko I, Friedrich A, Hanson NA, Morris CL, et al.  
1068 Identification of a novel interspecific hybrid yeast from a metagenomic spontaneously  
1069 inoculated beer sample using Hi-C. Yeast. 2018;35: 71–84. doi:10.1002/yea.3280
- 1070 56. Hall BG, Acar H, Nandipati A, Barlow M. Growth rates made easy. Mol Biol Evol.  
1071 2014;31: 232–238. doi:10.1093/molbev/mst187
- 1072

1073 **Supplementary Figures**

|          |          | PDB1    |         | PDB26   |         |         |         |         |         |         |         |          |          |          |          |          |          |
|----------|----------|---------|---------|---------|---------|---------|---------|---------|---------|---------|---------|----------|----------|----------|----------|----------|----------|
|          |          | Clone 1 | Clone 2 | Clone 1 | Clone 2 | Clone 3 | Clone 4 | Clone 5 | Clone 6 | Clone 7 | Clone 9 | Clone 10 | Clone 11 | Clone 12 | Clone 13 | Clone 20 | Clone 23 |
| PDB1     | Clone 1  | 10      | 0       | 0       | 0       | 1       | 0       | 0       | 1       | 0       | 0       | 0        | 0        | 0        | 0        | 0        | 0        |
|          | Clone 2  | 0       | 7       | 0       | 0       | 0       | 0       | 0       | 0       | 0       | 0       | 0        | 0        | 0        | 0        | 0        | 0        |
| PDB26    | Clone 1  | 0       | 0       | 20      | 1       | 0       | 0       | 0       | 0       | 0       | 1       | 0        | 0        | 0        | 0        | 0        | 0        |
|          | Clone 2  | 0       | 0       | 1       | 10      | 0       | 0       | 0       | 0       | 0       | 1       | 0        | 0        | 0        | 0        | 0        | 1        |
|          | Clone 3  | 1       | 0       | 0       | 0       | 14      | 0       | 0       | 1       | 0       | 0       | 0        | 0        | 0        | 0        | 0        | 0        |
|          | Clone 4  | 0       | 0       | 0       | 0       | 0       | 6       | 0       | 0       | 0       | 0       | 0        | 0        | 0        | 1        | 0        | 0        |
|          | Clone 5  | 0       | 0       | 0       | 0       | 0       | 0       | 13      | 0       | 1       | 0       | 0        | 0        | 0        | 0        | 0        | 0        |
|          | Clone 6  | 1       | 0       | 0       | 0       | 1       | 0       | 0       | 8       | 0       | 0       | 0        | 0        | 0        | 0        | 0        | 0        |
|          | Clone 7  | 0       | 0       | 0       | 0       | 0       | 0       | 1       | 0       | 8       | 0       | 0        | 0        | 0        | 0        | 0        | 0        |
|          | Clone 9  | 0       | 0       | 1       | 1       | 0       | 0       | 0       | 0       | 0       | 18      | 0        | 0        | 0        | 1        | 2        | 1        |
|          | Clone 10 | 0       | 0       | 0       | 0       | 0       | 0       | 0       | 0       | 0       | 0       | 6        | 0        | 0        | 0        | 0        | 0        |
|          | Clone 11 | 0       | 0       | 0       | 0       | 0       | 0       | 0       | 0       | 0       | 0       | 0        | 4        | 0        | 0        | 0        | 0        |
|          | Clone 12 | 0       | 0       | 0       | 0       | 0       | 0       | 0       | 0       | 0       | 0       | 0        | 0        | 6        | 0        | 0        | 0        |
|          | Clone 13 | 0       | 0       | 0       | 0       | 0       | 1       | 0       | 0       | 0       | 1       | 0        | 0        | 0        | 12       | 0        | 0        |
|          | Clone 20 | 0       | 0       | 0       | 0       | 0       | 0       | 0       | 0       | 0       | 2       | 0        | 0        | 0        | 0        | 26       | 0        |
| Clone 23 | 0        | 0       | 0       | 1       | 0       | 0       | 0       | 0       | 0       | 1       | 0       | 0        | 0        | 0        | 0        | 15       |          |

1074  
 1075 **Supplementary Fig 1.** The number of mutations shared between clones isolated from the first  
 1076 Postdoc Brewing replicate experiment. The orange highlight indicates mutations that were also  
 1077 observed in the first or last timepoint populations from the first Postdoc Brewing replicate.

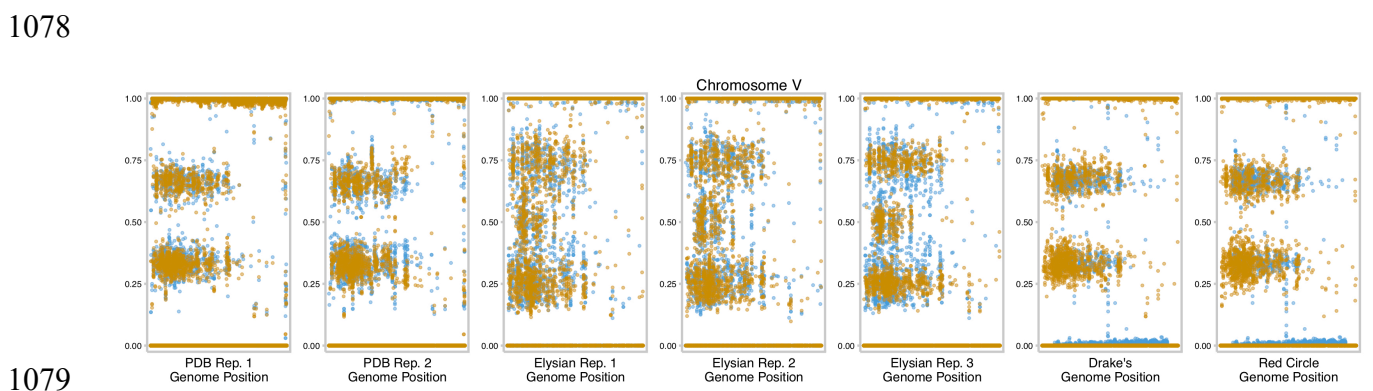

1080 **Supplementary Fig 2.** Allele frequency of chromosome V with the first timepoint colored in blue  
1081 and the final timepoint in orange.

1082

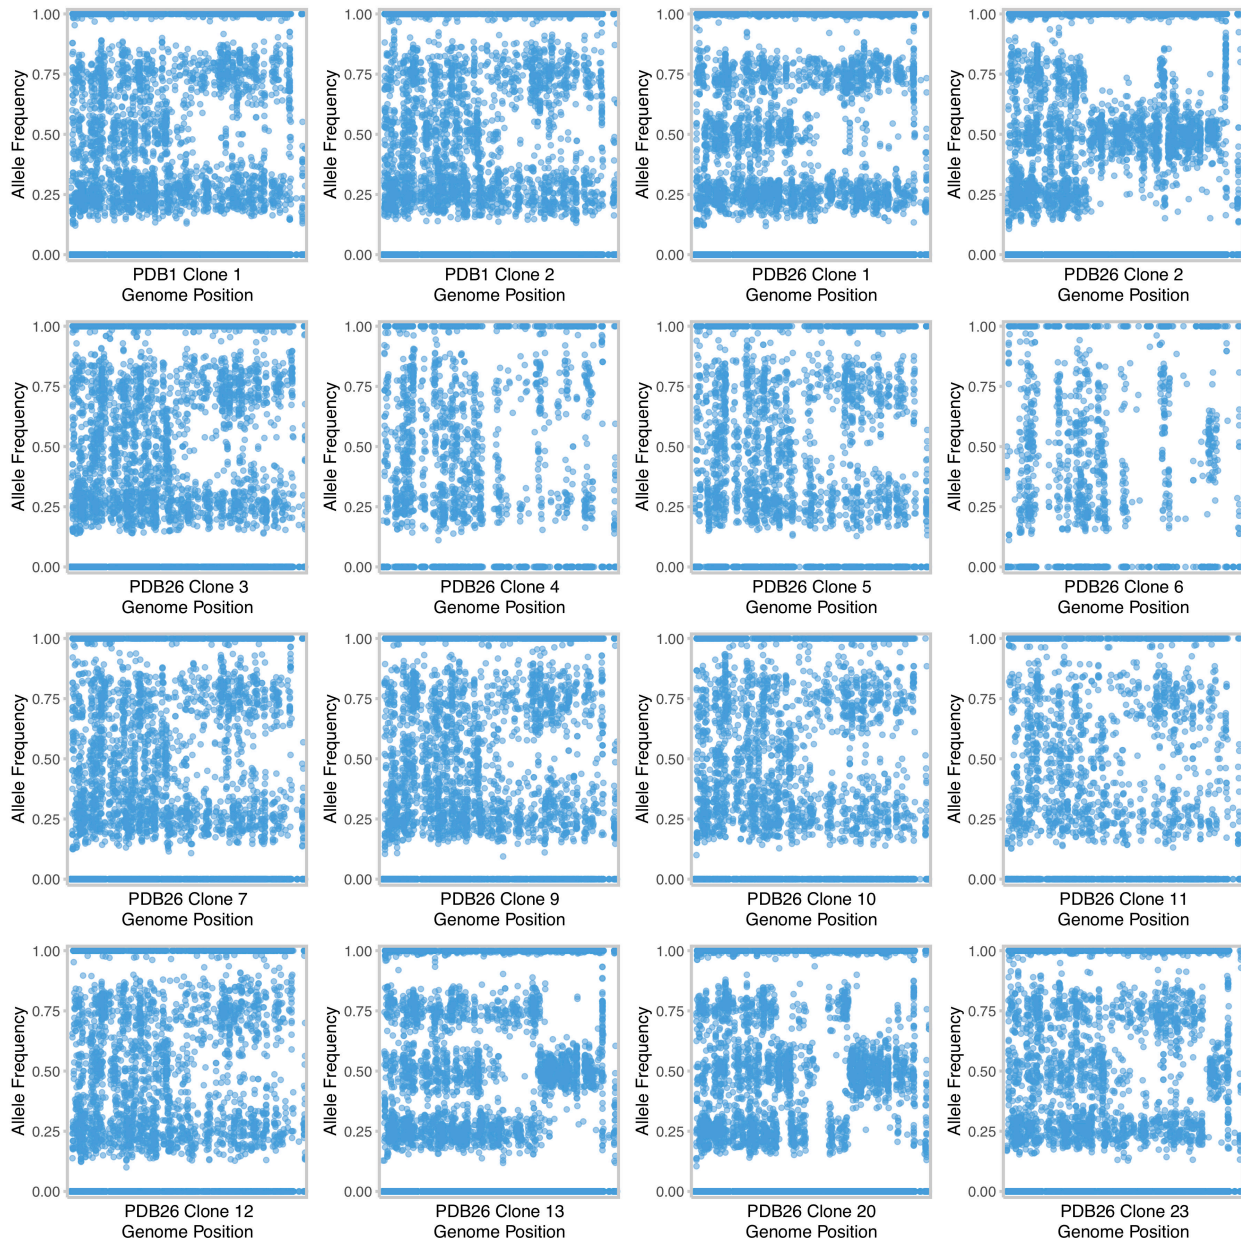

1084 **Supplementary Fig 3.** Allele frequency of chromosome VIII for every clone isolated from the first  
1085 Postdoc Brewing Co. replicate.

1086

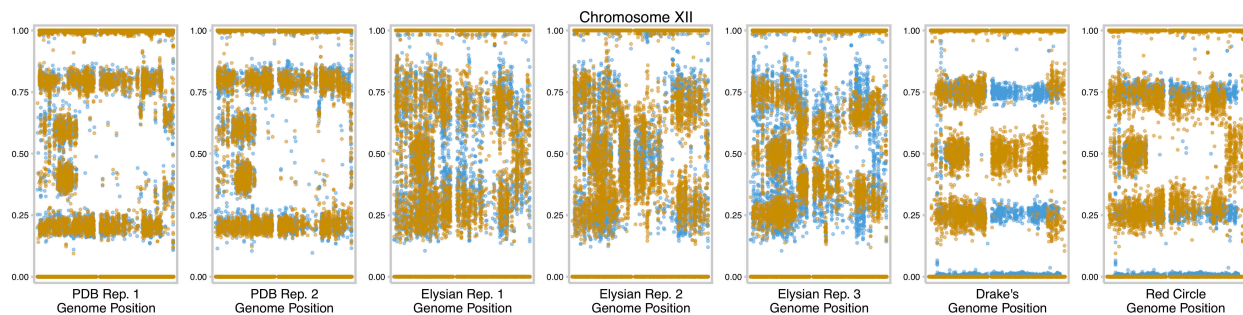

1088 **Supplementary Fig 4.** Allele frequency of chromosome XII with the first timepoint colored in blue  
1089 and the final timepoint in orange.

1090

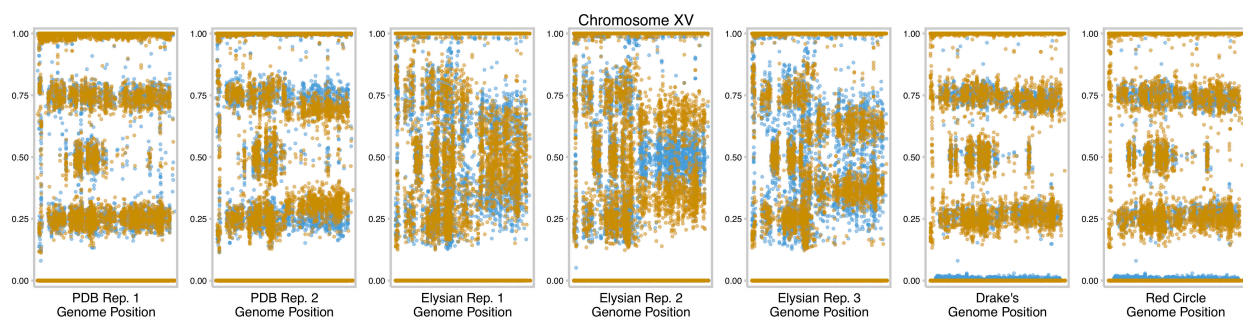

1092 **Supplementary Fig 5.** Allele frequency of chromosome XV with the first timepoint colored in blue  
1093 and the final timepoint in orange.

1094

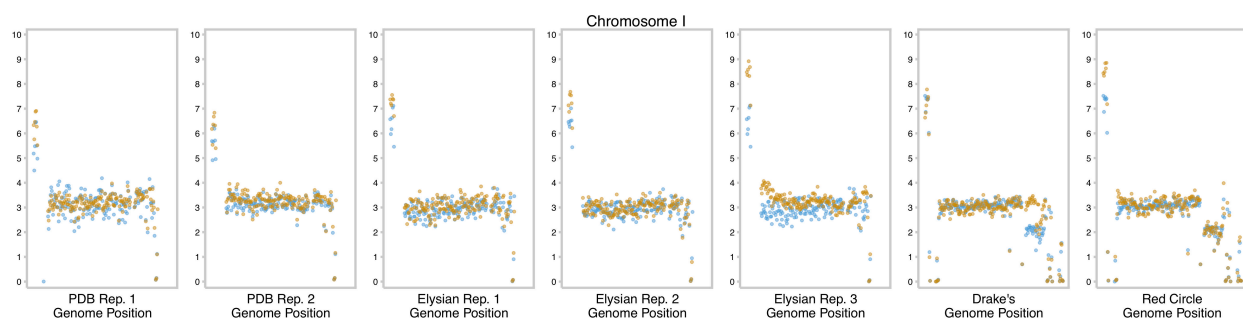

1096 **Supplementary Fig 6.** Copy number of chromosome I shown as 1000-bp sliding windows with  
1097 the first timepoint colored in blue and the final timepoint in orange.

1098

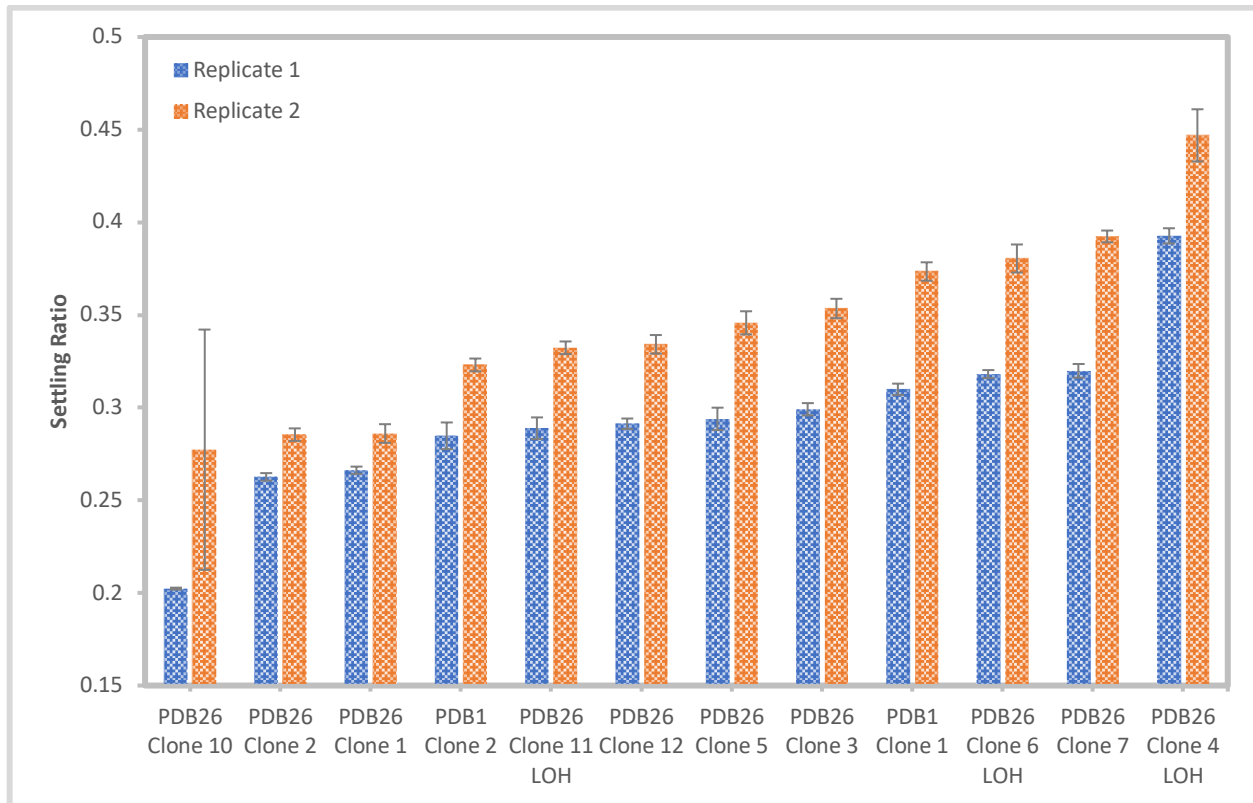

1099

1100 **Supplementary Fig 7.** Settling ratio of clones isolated from the first Postdoc Brewing Co.

1101 replicate.
